1

2

3

4

5 **Conserved properties of *Drosophila* Insomniac link sleep regulation and synaptic function**

6

7

8

9

10

11 Qiuling Li<sup>1</sup>, David A. Kellner<sup>1</sup>, Hayden A. M. Hatch<sup>1,#a</sup>, Tomohiro Yumita<sup>1</sup>, Sandrine Sanchez<sup>1</sup>,

12 Robert P. Machold<sup>1</sup>, C. Andrew Frank<sup>2,3</sup>, and Nicholas Stavropoulos<sup>1\*</sup>

13

14

15 <sup>1</sup>Neuroscience Institute, Department of Neuroscience and Physiology, New York University School of  
16 Medicine, New York, NY 10016, USA

17

18 <sup>2</sup>Department of Anatomy and Cell Biology, University of Iowa Carver College of Medicine, Iowa  
19 City, IA 52242, USA

20

21 <sup>3</sup>Interdisciplinary Programs in Genetics, Neuroscience, and MCB, University of Iowa, Iowa City, IA  
22 52242, USA

23

24 <sup>#a</sup>Current address: Department of Neuroscience, Albert Einstein College of Medicine, Bronx, NY  
25 10461, USA

26

27

28

29

30 \* Corresponding author

31 E-mail: [nicholas.stavropoulos@nyumc.org](mailto:nicholas.stavropoulos@nyumc.org) (NS)

## 32 **Abstract**

33 Sleep is an ancient animal behavior that is regulated similarly in species ranging from flies to  
34 mammals. Various genes that regulate sleep have been identified in invertebrates, but whether the  
35 functions of these genes are conserved in mammals remains poorly explored. *Drosophila insomniac*  
36 (*inc*) mutants exhibit severely shortened and fragmented sleep. Inc protein physically associates with  
37 the Cullin-3 (Cul3) ubiquitin ligase, and neuronal depletion of Inc or Cul3 strongly curtails sleep,  
38 suggesting that Inc is a Cul3 adaptor that directs the ubiquitination of neuronal substrates that regulate  
39 sleep. Three proteins similar to Inc exist in vertebrates—KCTD2, KCTD5, and KCTD17—but are  
40 uncharacterized within the nervous system and their functional conservation with Inc has not been  
41 addressed. Here we show that Inc and its mouse orthologs exhibit striking biochemical and functional  
42 interchangeability within Cul3 complexes. Remarkably, KCTD2 and KCTD5 restore sleep to *inc*  
43 mutants, indicating that they can substitute for Inc in vivo and engage its neuronal targets that impact  
44 sleep. Inc and its orthologs traffic similarly within fly and mammalian neurons and are present at  
45 synapses, suggesting that their substrates include synaptic proteins. Consistent with such a mechanism,  
46 *inc* mutants exhibit defects in synaptic structure and physiology, indicating that Inc is vital for both  
47 synaptic function and sleep. Our findings reveal that molecular functions of Inc are conserved through  
48 ~600 million years of evolution and support the hypothesis that Inc and its orthologs participate in an  
49 evolutionarily conserved ubiquitination pathway that links synaptic function and sleep regulation.

50

51

52

53

54

55 **Keywords:**

56 *Drosophila*, sleep, synapse, ubiquitin, BTB, Inc, Cul3, KCTD2, KCTD5, KCTD17

## 57 **Author summary**

58 Sleep is ubiquitous among animals and is regulated in a similar manner across phylogeny, but  
59 whether conserved molecular mechanisms govern sleep is poorly defined. The Insomniac protein is  
60 vital for sleep in *Drosophila* and is a putative adaptor for the Cul3 ubiquitin ligase. We show that two  
61 mammalian orthologs of Insomniac can restore sleep to flies lacking Insomniac, indicating that the  
62 molecular functions of these proteins are conserved through evolution. Our comparative analysis  
63 reveals that Insomniac and its mammalian orthologs localize to neuronal synapses and that Insomniac  
64 impacts synaptic structure and physiology. Our findings suggest that Insomniac and its mammalian  
65 orthologs are components of an evolutionarily conserved ubiquitination pathway that links synaptic  
66 function and the regulation of sleep.

67

68

## 69 **Introduction**

70 Sleep is an evolutionarily ancient behavior present in vertebrates and invertebrates [1]. The  
71 similar characteristics of sleep states across animal phylogeny suggest that both the functions of sleep  
72 and the regulation of sleep may have a common evolutionary basis [2]. In diverse animals including  
73 mammals and insects, sleep is regulated similarly by circadian and homeostatic mechanisms [3]. The  
74 circadian regulation of sleep is better understood at a molecular level, and numerous studies have  
75 revealed that the underlying genes and intracellular pathways are largely conserved from flies to  
76 humans [4-10]. In contrast, the molecular mechanisms underlying the non-circadian regulation of  
77 sleep—including those governing sleep duration, consolidation, and homeostasis—remain less well  
78 defined, and their evolutionary conservation is largely unexplored.

79 Mutations of the *Drosophila insomnia (inc)* gene [11] severely curtail the duration and  
80 consolidation of sleep but do not alter its circadian regulation [11,12]. *inc* encodes a protein of the  
81 Bric-à-brac, Tramtrack, and Broad / Pox virus zinc finger (BTB/POZ) superfamily [13], which  
82 includes adaptors for the Cullin-3 (Cul3) E3 ubiquitin ligase complex [14-17]. Cul3 adaptors have a  
83 modular structure, in which the BTB domain binds Cul3 and a second distal domain recruits substrates  
84 to the Cul3 complex for ubiquitination [14-17]. The BTB domain also mediates adaptor self-  
85 association, enabling the oligomerization of Cul3 complexes and the efficient recruitment and  
86 ubiquitination of substrates [18,19]. Biochemical and genetic evidence supports the hypothesis that Inc  
87 is a Cul3 adaptor [11,12]. Inc and Cul3 physically interact in cultured cells [11,12] and Inc is able to  
88 self-associate [12]. In vivo, neuronal RNAi against *inc* or *Cul3* strongly reduces sleep [11,12], and  
89 reduction in the levels of Nedd8, a protein whose conjugation to Cullins is essential for their activity,  
90 also decreases sleep [11]. While Inc is thus likely to function as a Cul3 adaptor within neurons to  
91 promote sleep, the neuronal mechanisms through which Inc influences sleep are unknown.

92 Three proteins similar to Inc—KCTD2, KCTD5, and KCTD17—are present in vertebrates  
93 [11,20,21], but their functions in the nervous system are uncharacterized and their functional

94 conservation with Inc has not been addressed. KCTD5 can self-associate and bind Cul3 [20],  
95 suggesting that it may serve as a Cul3 adaptor, yet no substrates have been identified among its  
96 interacting partners [22,23]. One KCTD17 isoform has been shown to function as a Cul3 adaptor for  
97 trichoplein, a regulator of primary cilia [24]. However, trichoplein-binding sequences are not present  
98 in Inc, KCTD2, KCTD5, or other KCTD17 isoforms, and trichoplein is not conserved in *Drosophila*.  
99 Thus, it remains unclear whether Inc and its vertebrate homologs have conserved molecular functions,  
100 particularly within neurons and cellular pathways relevant to sleep.

101 Here, we assess the functional conservation of Inc and its mammalian orthologs and elucidate  
102 a neuronal mechanism through which they may impact sleep. Inc and each of its orthologs bind Cul3  
103 and self-associate, supporting a universal role for these proteins as Cul3 adaptors. Inc and its orthologs  
104 furthermore exhibit biochemical interchangeability within Inc-Inc and Inc-Cul3 complexes, indicating  
105 that the oligomeric architecture of Inc-Cul3 complexes is highly conserved. Strikingly, KCTD2 and  
106 KCTD5 can functionally substitute for Inc in vivo and restore sleep to *inc* mutants, indicating that  
107 these Inc orthologs readily engage the molecular targets through which Inc impacts sleep. Our studies  
108 furthermore reveal that Inc and its orthologs localize similarly within fly and mammalian neurons and  
109 traffic to synapses. Finally, we show that *inc* mutants exhibit defects in synaptic structure and  
110 physiology, indicating that *inc* is essential for both sleep and synaptic function. Our findings  
111 demonstrate that molecular functions of Inc are conserved from flies to mammals, and support the  
112 hypothesis that Inc and its orthologs direct the ubiquitination of conserved neuronal proteins that link  
113 sleep regulation and synaptic function.

## 114 **Results**

### 115 **The mammalian orthologs of *Insomniac* are expressed in the nervous system**

116 *Inc* functions in neurons to impact sleep [11,12]. To assess whether *Inc* orthologs are  
117 expressed in the mammalian nervous system, we performed RT-PCR on mouse brain RNA using  
118 primers specific for KCTD2, KCTD5, and KCTD17. All three genes are expressed in the brain (Fig  
119 1A), and in situ hybridizations reveal expression within cortex, thalamus, striatum, pons, and  
120 cerebellum among other brain regions (S1 Fig). Cloning of RT-PCR products revealed single  
121 transcripts for KCTD2 and KCTD5, encoding proteins of 263 and 234 residues respectively, and two  
122 alternatively spliced transcripts for KCTD17, encoding proteins of 225 and 220 residues with distinct  
123 C-termini (Fig 1B and S2A Fig). These KCTD17 isoforms, KCTD17.2 and KCTD17.3, have not been  
124 characterized previously and lack residues of a longer KCTD17 isoform required to bind trichoplein  
125 (S2B Fig) [24]. Thus, KCTD17.2 and KCTD17.3 are likely to have different molecular partners.  
126 KCTD17.2 and KCTD17.3 behaved indistinguishably in our experiments except where noted below.  
127 *Inc* and its mouse orthologs share ~60% sequence identity, and have variable N-termini followed by a  
128 BTB domain, an intervening linker, and conserved C-termini (S2A Fig) [11,20,21].

129 We next assessed the expression of KCTD2, KCTD5, and KCTD17 proteins, using a  
130 polyclonal anti-KCTD5 antibody that cross-reacts with mouse *Inc* orthologs and *Drosophila Inc* (S3A  
131 Fig). This antibody detected a strongly reactive species of ~26 kD and additional species of ~28 to 29  
132 kD in extracts from mouse and rat brain, cultured rat cortical neurons, and human 293T cells (Figs 1C  
133 and 5D, and S3A Fig), consistent with the range of molecular weights predicted for KCTD2, KCTD5,  
134 and KCTD17 (Fig 1B). The size of these immunoreactive species and their biochemical properties,  
135 described further below, indicate that they correspond to one or more isoforms of KCTD2, KCTD5,  
136 and KCTD17. The expression of *Inc* orthologs in the mammalian brain and *Inc* in the fly brain [11],  
137 together with the similarity of their primary sequences, suggests that *Inc* defines a protein family that  
138 may have conserved functions in the nervous system.

139

140 **Insomniac family members self-associate and bind Cul3 in an evolutionarily conserved**  
141 **and interchangeable manner**

142 Inc and KCTD5 are able to bind Cul3 and to self-associate [11,12,20], key attributes of BTB  
143 adaptors [14-17]. To determine whether these attributes are universal to Inc orthologs and their  
144 isoforms expressed in the nervous system, we first examined the physical interactions of these proteins  
145 with mouse Cul3. Co-immunoprecipitations revealed that KCTD2, KCTD5, KCTD17.2, and  
146 KCTD17.3 are able to associate with mouse Cul3 (Fig 2A and data not shown), with KCTD5  
147 exhibiting stronger or more stable interactions than KCTD2 and KCTD17. Thus, the ability to bind  
148 Cul3 is a conserved property of Inc and its mouse orthologs. Epitope-tagged Cul3 also co-  
149 immunoprecipitated the endogenous ~26 kD species detected by anti-KCTD5 antibody, confirming  
150 that this species represents KCTD5 or another Inc ortholog (S3B Fig).

151 To assess the extent to which the Inc-Cul3 interface is evolutionarily conserved, we tested  
152 whether *Drosophila* Inc is able to associate with mouse Cul3 in a cross-species manner. We observed  
153 that fly Inc and mouse Cul3 interact (Fig 2A), indicating that Inc readily assembles into mammalian  
154 Cul3 complexes. Conversely, we tested whether mouse KCTD2, KCTD5, and KCTD17 can associate  
155 with fly Cul3 in *Drosophila* S2 cells, and observed that each Inc ortholog associated with fly Cul3 in a  
156 manner indistinguishable from Inc (Fig 2B). The interchangeable biochemical associations of Inc  
157 family members and Cul3 indicate that the Inc-Cul3 interface is functionally conserved from flies to  
158 mammals.

159 Self-association is a critical property of BTB adaptors that enables the oligomerization of Cul3  
160 complexes and that stimulates substrate ubiquitination [18,19]. To test whether Inc orthologs self-  
161 associate in a manner similar to Inc [12], we co-expressed FLAG- and Myc-tagged forms of each Inc  
162 ortholog in mammalian cells and performed co-immunoprecipitations. KCTD2, KCTD5, and  
163 KCTD17 each homomultimerized strongly (Fig 3A). Thus, homo-oligomerization is a shared property

164 of Inc family proteins. The presence of three Inc orthologs in mammals and their likely co-expression  
165 in brain regions such as thalamus and cortex (S1 Fig) led us to test whether these proteins can also  
166 heteromultimerize. We observed robust heteromeric associations between all pairwise combinations of  
167 Inc orthologs (Fig 3A), a property that may enable functional redundancy in vivo or the assembly of  
168 functionally distinct complexes. To further probe the multimeric self-associations of Inc family  
169 members, we tested whether KCTD2, KCTD5, and KCTD17 can heteromultimerize with *Drosophila*  
170 Inc. We observed that each Inc ortholog associates readily with Inc in both mammalian and  
171 *Drosophila* cells (Fig 3A and 3B). Thus, the multimerization interface of Inc family members is highly  
172 conserved through evolution. Together with the interchangeable associations of Inc family members  
173 and Cul3 (Fig 2), these findings strongly suggest a conserved oligomeric architecture for complexes  
174 containing Cul3 and Inc family members.

175

## 176 **KCTD2 and KCTD5 substitute for *Drosophila* Inc in vivo and restore sleep to *inc*** 177 **mutants**

178 The biochemical interchangeability of Inc and its mouse orthologs prompted us to test whether  
179 Inc function, including its presumed ability to serve as a Cul3 adaptor in vivo and ubiquitinate specific  
180 neuronal proteins relevant to sleep, is conserved between flies and mammals. We therefore generated  
181 UAS transgenes expressing Myc-tagged forms of Inc, KCTD2, KCTD5, KCTD17.2, and KCTD17.3,  
182 integrated each at the *attP2* site [25], and backcrossed these lines to generate an isogenic allelic series.  
183 Expression of these transgenes panneuronally with *elav<sup>c155</sup>-Gal4* yielded similar levels of expression  
184 for Inc, KCTD2, and KCTD5, weak expression of KCTD17.2, and low levels of KCTD17.3  
185 expression near the threshold of detection (Fig 4A). Next, we assessed the behavioral consequences of  
186 expressing mouse Inc orthologs in vivo. Animals expressing Inc orthologs under the control of  
187 *elav<sup>c155</sup>-Gal4* slept largely indistinguishably from control animals expressing Inc or from those lacking  
188 a UAS transgene, as indicated by analysis of sleep duration, daytime and nighttime sleep, sleep bout



189 length, and sleep bout number (Fig 4C and S4A-S4D Fig). Thus, neuronal expression of Inc and its  
190 mouse orthologs does not elicit significant dominant negative effects or otherwise inhibit endogenous  
191 *inc* function, similar to ubiquitous or neuronal expression of untagged Inc [11].

192 To assess whether mouse Inc orthologs can functionally substitute for *Drosophila* Inc, we  
193 measured their ability to rescue the sleep defects of *inc<sup>1</sup>* null mutants [11]. Sleep is a behavior  
194 sensitive to genetic background [26,27], environment [28], and other influences, and thus the ability of  
195 Inc orthologs to confer behavioral rescue represents a stringent test of *inc* function. Inc and its  
196 orthologs expressed under *inc-Gal4* control in *inc<sup>1</sup>* animals accumulated with relative levels similar to  
197 those in *elav-Gal4* animals (Fig 4A and 4B). Expression of Myc-Inc under *inc-Gal4* control fully  
198 rescued sleep in *inc* mutants to wild-type levels, indicating that Myc-Inc recapitulates the function of  
199 endogenous Inc protein (Fig 4D). Strikingly, expression of mouse KCTD2 and KCTD5 strongly  
200 rescued *inc* sleep defects, including total sleep duration (Fig 4D), the distribution of sleep throughout  
201 the day (Fig 4E), and most other sleep parameters (S4E-S4H Fig). This rescue indicates that KCTD2  
202 and KCTD5 not only recapitulate Inc-Inc and Inc-Cul3 interactions (Figs 2 and 3), but that they retain  
203 other critical aspects of Inc function including its presumed ability to engage and ubiquitinate neuronal  
204 target proteins in vivo. In contrast, KCTD17.2 and KCTD17.3 failed to rescue *inc* phenotypes (Fig 4D  
205 and S4E-S4H Fig). The restoration of sleep-wake cycles by KCTD2 and KCTD5 but not by isoforms  
206 of KCTD17 contrasts with the apparent biochemical interchangeability of these proteins with respect  
207 to Inc-Inc and Inc-Cul3 associations (Figs 2 and 3). The inability of KCTD17.2 and KCTD17.3 to  
208 rescue *inc* sleep defects may reflect the lower abundance of these proteins in transgenic flies (Fig 4A  
209 and 4B) or differences in the intrinsic activities of these KCTD17 isoforms, including their ability to  
210 engage Inc targets relevant to sleep.

211

212 **Insomniac family members traffic through neuronal projections and localize to synapses**  
213 **in mammalian neurons**

214 Inc is required in neurons for normal sleep-wake cycles [11,12], indicating that it impacts  
215 aspects of neuronal function that are essential for sleep. The subcellular localization of Cul3 adaptors  
216 reflects their biological functions and variously includes the cytoplasm [29], nuclear foci [30],  
217 cytoskeletal structures [31,32], and perisynaptic puncta in neurons [33]. The subcellular distribution of  
218 Inc is unknown, as available antisera do not efficiently detect endogenous Inc [11], and the  
219 localization of Inc orthologs in neurons is similarly uncharacterized. Anti-KCTD5 antibody did not  
220 efficiently detect endogenously expressed Inc orthologs in immunohistochemical staining (data not  
221 shown). We therefore examined the subcellular localization of Inc family members fused to epitope  
222 tags and expressed in cultured cells, primary neurons, and in flies *in vivo*. In S2 cells, Myc-tagged Inc  
223 was localized to the cytoplasm and excluded from the nucleus (S5A Fig), and an Inc-GFP fusion was  
224 distributed similarly in both live cells and after fixation (S5A Fig). Inc orthologs, Inc-GFP, and mouse  
225 Cul3 were similarly distributed in the cytoplasm and excluded from the nucleus in cultured  
226 mammalian cells (S5B-S5D Fig).

227 We next assessed the localization of tagged Inc orthologs in primary neurons cultured from  
228 cortex, a region of the brain in which they are expressed *in vivo* (Fig 1C and S1 Fig). In cortical  
229 neurons, KCTD2, KCTD5, and KCTD17 were excluded from the nucleus and localized to the cytosol  
230 and to dendritic and axonal projections (Fig 5A). Within dendrites, these proteins trafficked to spines  
231 as indicated by co-staining against PSD95, a component of the postsynaptic density (Fig 5B). In  
232 axons, Inc orthologs were enriched at varicosities costaining with synapsin, a vesicle-associated  
233 protein that marks presynaptic termini (Fig 5C). Inc localized similarly to its mammalian orthologs  
234 including at pre- and post-synaptic structures (Fig 5A-5C), suggesting that intrinsic determinants  
235 governing the localization of Inc and its orthologs in neurons may be functionally conserved.

236 To assess whether the synaptic localization of Inc orthologs in transfected neurons reflects the  
237 distribution of corresponding endogenous proteins, we fractionated cortex to isolate synaptosomes and  
238 subjected them to biochemical analysis. Enrichment of presynaptic and postsynaptic proteins in these  
239 preparations was confirmed by blotting for synapsin and PSD95 respectively (Fig 5D). Probing with

240 anti-KCTD5 antibody revealed that Inc orthologs were present and modestly enriched in  
241 synaptosomes with respect to total membrane fractions (Fig 5D). Similarly, endogenous Cul3 was  
242 present and enriched in synaptic fractions in its native and higher-molecular weight neddylated form,  
243 indicating that active Nedd8-conjugated Cul3 complexes are present at synapses (Fig 5D). Thus, Inc  
244 orthologs and Cul3 are present endogenously at mammalian synapses in vivo, suggesting that they  
245 form functional ubiquitin ligase complexes at synapses and that their substrates include synaptic  
246 proteins.

247

### 248 **Insomniac localizes to the neuronal cytosol, arborizations, and synapses in vivo**

249 To assess the localization of Inc in vivo and determine whether it is similar to that of its mouse  
250 orthologs, we examined flies expressing Myc-Inc and 3×FLAG-Inc, forms of Inc which fully rescue  
251 the sleep defects of *inc* mutants (Fig 4 and data not shown) and are thus likely to recapitulate attributes  
252 of endogenous Inc including its subcellular localization. In the adult brain, expression of 3×FLAG-Inc  
253 under the control of *inc-Gal4* yielded strong anti-FLAG signal in cell bodies and in projections  
254 including those of the mushroom bodies, ellipsoid body, and fan-shaped body (Fig 6A). To assess the  
255 subcellular localization of Inc in adult neurons more clearly, we first identified sparse neuronal  
256 populations likely to express *inc* natively, as indicated by their expression of the *inc-Gal4* driver that  
257 fully rescues *inc* mutants (Fig 4D). Animals bearing *inc-Gal4* and a nuclear localized GFP reporter  
258 (*UAS-nls-GFP*) exhibited GFP signal in corazonin positive (CRZ<sup>+</sup>) neurons in the dorsal brain [34]  
259 and in pigment dispersing factor-expressing (PDF<sup>+</sup>) circadian pacemaker neurons [35] (Fig 6B and  
260 6C). We then utilized Gal4 drivers specific for these neuronal subpopulations to express Myc-Inc and  
261 assess its localization. In both populations, Myc-Inc was largely excluded from the nucleus and  
262 present in neuronal cell bodies and arborizations (Fig 6D and 6F). To assess the nature of projections  
263 containing Inc, we compared the pattern of Inc localization to that of the pre- and post-synaptic  
264 markers synaptotagmin-GFP (Syt-eGFP) [36] and DenMark [37] expressed in the same neuronal  
265 populations. In corazonin neurons, whose presynaptic and dendritic compartments are well separated,

266 Myc-Inc trafficked both to medial dendritic structures and to lateral puncta located in the same regions  
267 as presynaptic termini of these neurons (Fig 6D and 6E). In PDF<sup>+</sup> neurons, Myc-Inc localized to  
268 ipsilateral ventral projections to accessory medulla that are of a largely dendritic character (Fig 6F and  
269 6G) [38], but was not detectable in axonal projections to the dorsal brain. Thus, Inc is able to traffic to  
270 both pre- and postsynaptic compartments in adult neurons in a manner that may be influenced by cell-  
271 type specific factors.

272 We also assessed Myc-Inc localization in the third instar larval brain and at the larval  
273 neuromuscular junction (NMJ), the latter which permits higher resolution analysis of synaptic termini  
274 [39]. In animals bearing *inc-Gal4* and *UAS-Myc-Inc*, we observed Inc signal in motor neuron cell  
275 bodies and their axonal projections innervating the NMJ (Fig 6H). As in the adult brain (Fig 6A) [11],  
276 Inc expression was present in a subset of neurons, as evident in a fraction of Myc- and HRP-positive  
277 projections emanating from the ventral ganglion. At the NMJ itself, Inc was enriched at synaptic  
278 boutons and was more prominently expressed within type Is boutons (Fig 6I and S6A Fig). The  
279 presence of Inc in motor neurons, their axonal projections, and at boutons circumscribed by  
280 postsynaptic DLG signal indicates that Inc signal in these preparations is presynaptic (Fig 6I). Muscle  
281 nuclei exhibited weaker Inc signal (Fig 6I), suggesting, along with analysis of additional *inc-Gal4*  
282 transgenes (S6B Fig), that *inc* may also be expressed postsynaptically at the NMJ. Taken together with  
283 findings that Inc orthologs traffic to mammalian synapses and have functions conserved with those of  
284 Inc (Figs 4 and 5), these data suggest that Inc family members may have evolutionarily conserved  
285 functions at synapses.

286

287 **Altered synaptic anatomy and reduced synaptic strength of *inc* mutants suggests that**  
288 **Inc family proteins may link synaptic function and sleep**

289 A prominent hypothesis invokes synaptic homeostasis as a key function of sleep [40], and  
290 findings from vertebrates and flies support the notion that sleep modulates synaptic structure [e.g. 41-

291 44]. Neuronal *inc* activity is essential for normal sleep [11,12], but whether *inc* impacts synaptic  
292 function is not known. To test whether the distribution of Inc at synaptic termini reflects a synaptic  
293 function, we assessed the anatomical and physiological properties of *inc* mutants at the NMJ. *inc*<sup>1</sup> and  
294 *inc*<sup>2</sup> null mutants both exhibited significantly increased bouton number with respect to wild-type  
295 animals (Fig 7A and 7B), indicating that Inc is essential for regulation of synaptic growth or plasticity.  
296 To assess whether these anatomical defects are associated with altered synaptic transmission, we  
297 recorded postsynaptically from muscle in control and transheterozygous *inc*<sup>1</sup>/*inc*<sup>2</sup> animals. While the  
298 amplitude of spontaneous miniature postsynaptic potentials was not significantly altered in *inc*  
299 mutants, their frequency was reduced (Fig 7C-7E). The amplitude of evoked postsynaptic potentials  
300 triggered by presynaptic stimulation was significantly reduced in *inc*<sup>1</sup>/*inc*<sup>2</sup> mutants, and quantal  
301 content was similarly decreased (Fig 7F-7H). The attenuation of evoked potentials and increased  
302 bouton number in *inc* mutants suggest that a compensatory increase in synaptic growth may arise in  
303 response to defects in synaptic transmission, though this increase does not compensate for the  
304 decreased strength of *inc* synapses. These data indicate that *inc* is vital for normal synaptic structure  
305 and physiology and suggest, together with the ability of Inc and its orthologs to localize to synapses,  
306 that Inc family members may direct the ubiquitination of proteins critical for synaptic function.

## 307 **Discussion**

308           The presence of sleep states in diverse animals has been suggested to reflect a common  
309 purpose for sleep and the conservation of underlying regulatory mechanisms [45]. Here we have  
310 shown that attributes of the Insomniac protein likely to underlie its impact on sleep in *Drosophila*—its  
311 ability to function as a multimeric Cul3 adaptor and engage neuronal targets that impact sleep—are  
312 functionally conserved in its mammalian orthologs. Our comparative analysis of Inc family members  
313 in vertebrate and invertebrate neurons furthermore reveals that these proteins traffic to synapses and  
314 that Inc itself is essential for normal synaptic structure and excitability. These findings support the  
315 hypothesis that Inc family proteins serve as Cul3 adaptors and direct the ubiquitination of conserved  
316 neuronal substrates that impact sleep and synaptic function.

317           The ability of KCTD2 and KCTD5 to substitute for Inc in the context of sleep is both  
318 surprising and notable given the complexity of sleep-wake behavior and the likely functions of these  
319 proteins as Cul3 adaptors. Adaptors are multivalent proteins that self-associate, bind Cul3, and recruit  
320 substrates, and these interactions are further regulated by additional post-translational mechanisms  
321 [46]. Our findings indicate that KCTD2 and KCTD5 readily substitute for Inc within oligomeric Inc-  
322 Cul3 complexes, and strongly suggest that these proteins recapitulate other aspects of Inc function in  
323 vivo including the ability to engage neuronal targets that impact sleep. The simplest explanation for  
324 why KCTD2 and KCTD5 have retained the apparent ability to engage Inc targets despite the  
325 evolutionary divergence of *Drosophila* and mammals is that orthologs of Inc targets are themselves  
326 conserved in mammals. This inference draws support from manipulations of *Drosophila* Roadkill/HIB  
327 and its mammalian ortholog SPOP, Cul3 adaptors of the MATH-BTB family that regulate the  
328 conserved Hedgehog signaling pathway [47]. While the ability of SPOP to substitute for HIB has not  
329 been assessed by rescue at an organismal level, clonal analysis in *Drosophila* indicates that ectopically  
330 expressed mouse SPOP can degrade the endogenous HIB substrate Cubitus Interruptus (Ci), and  
331 conversely, that HIB can degrade mammalian Gli proteins that are the conserved orthologs of Ci and

332 substrates of SPOP [47]. By analogy, Inc targets that impact sleep are likely to have orthologs in  
333 vertebrates that are recruited by KCTD2 and KCTD5 to Cul3 complexes. While our manipulations do  
334 not resolve whether KCTD17 can substitute for Inc in vivo, the ability of KCTD17 to assemble with  
335 fly Inc and Cul3 suggests that any functional divergence among mouse Inc orthologs is likely to arise  
336 outside of the BTB domain, and in particular may reflect properties of their C-termini including the  
337 ability to recruit substrates.

338         The finding that Inc transits to synapses and is required for normal synaptic function is  
339 intriguing in light of hypotheses that invoke synaptic homeostasis as a key function of sleep [40].  
340 While ubiquitin-dependent mechanisms contribute to synaptic function and plasticity [48-51] and  
341 sleep is known to influence synaptic remodeling in both vertebrates and invertebrates [41,43,44,52],  
342 molecular links between the two processes remain elusive. Our findings suggest that the neuronal  
343 requirement of Inc for normal sleep-wake cycles may be intimately linked to its function at synapses.  
344 The synaptic phenotypes of *inc* mutants—increased synaptic growth, decreased evoked  
345 neurotransmitter release, and modest effects on spontaneous neurotransmission—are qualitatively  
346 distinct from those of other short sleeping mutants. *Shaker (Sh)* and *Hyperkinetic (Hk)* mutations  
347 decrease sleep in adults [26,53] but increase both excitability and synaptic growth at the NMJ [54-56],  
348 suggesting that synaptic functions of Inc may affect sleep by a mechanism different than broad  
349 neuronal hyperexcitability. While a parsimonious model is that Inc directs the ubiquitination of a  
350 target critical for synaptic transmission both at the larval NMJ and in neuronal populations that  
351 promote sleep, the precise mechanisms await the elucidation of Inc targets in the context of synaptic  
352 physiology and sleep-wake behavior. The identification of Inc targets is also essential to distinguish  
353 possible presynaptic and postsynaptic functions of Inc, and whether Inc engages local synaptic  
354 proteins or extrasynaptic targets that ultimately influence synaptic function.

355         A clear implication of our findings is that neuronal targets and synaptic functions of Inc may  
356 be conserved in other animals. While the impact of Inc orthologs on sleep in vertebrates is as yet  
357 unknown, findings from *C.elegans* support the notion that conserved molecular functions of Inc and

358 Cul3 may underlie similar behavioral outputs in diverse organisms. INSO-1/C52B11.2, the only  
359 *C.elegans* ortholog of Inc, interacts with Cul3 [14], and RNAi against Cul3 and INSO-1 reduces the  
360 duration of lethargus, a quiescent sleep-like state, suggesting that effects of Cul3- and Inc-dependent  
361 ubiquitination on sleep may be evolutionarily conserved [57]. The functions of Inc orthologs and Cul3  
362 in the mammalian nervous system await additional characterization, but emerging data suggest  
363 functions relevant to neuronal physiology and disease. Human mutations at the *KCTD2/ACGH* locus  
364 are associated with Alzheimer's disease [58], and mutations of *KCTD17* with myoclonic dystonia [59].  
365 *Cul3* lesions have been associated in several studies with autism spectrum disorders [60-62] and  
366 comorbid sleep disturbances [62]. More generally, autism spectrum disorders are commonly  
367 associated with sleep deficits [63] and are thought to arise in many cases from altered synaptic  
368 function [64], but molecular links to sleep remain fragmentary. Studies of Inc family members and  
369 their conserved functions in neurons are likely to broaden our understanding of how ubiquitination  
370 pathways may link synaptic function to the regulation of sleep and other behaviors.



## 371 **Methods**

### 372 **RT-PCR and in situ hybridization**

373 Total RNA was isolated with TRIZOL (ThermoFisher) from a single brain hemisphere of a  
374 mixed C57BL/6 background mouse. 5 µg total RNA was annealed to random hexamer primers and  
375 reverse transcribed with ThermoScript (ThermoFisher) according to the manufacturer's protocol.  
376 KCTD2, KCTD5, and KCTD17 transcripts were amplified using primer pairs oNS286 and oNS287,  
377 oNS288 and oNS289, and oNS290 and oNS291, respectively.

378 For in situ hybridization, DNA templates bearing a terminal SP6 promoter for in vitro  
379 transcription were generated by PCR amplification of C57BL/6 mouse genomic DNA, using primer  
380 pairs oNS1204 and oNS1205 for KCTD2, oNS1207 and oNS1208 for KCTD5, and oNS1213 and  
381 oNS1214 for KCTD17. Riboprobes were transcribed with SP6 polymerase and DIG-11-UTP or  
382 Fluorescein-12-UTP (Roche). In situ hybridization was performed as described [65], amplifying  
383 Fluorescein- and DIG-labeled probes with Fluorescein-tyramide and Cy5-tyramide (Perkin Elmer)  
384 respectively.

385

### 386 **Plasmids and molecular cloning**

387 Vectors for *Drosophila* transgenesis were as follows:

388 pUASTattB-Myc-Inc (pNS346) encodes a 1× N-terminal Myc epitope (MEQKLISEEDLAS)  
389 fused to Inc, and was generated by three piece ligation of BglII-XhoI digested pUASTattB [66], a  
390 BglII-NheI 1×Myc fragment generated by phosphorylating and annealing oligonucleotides oNS283  
391 and oNS284, and an NheI-XhoI *inc* fragment liberated from the PCR amplification product of  
392 pUAST-Inc (pNS272) [11] template and primers oNS277 and oNS285.

393 pUASTattB-Myc-KCTD2 (pNS347) was generated similarly to pNS346, substituting a NheI-  
394 XhoI KCTD2 fragment liberated from the PCR amplification product of mouse brain cDNA and

395 primers oNS286 and oNS287. Amplified KCTD2 sequences are identical to those within GenBank  
396 accession NM\_183285.3.

397 pUASTattB-Myc-KCTD5 (pNS348) was generated similarly to pNS346, substituting a NheI-  
398 XhoI KCTD5 fragment liberated from the PCR amplification product of mouse brain cDNA and  
399 primers oNS288 and oNS289. Amplified KCTD5 sequences are identical to those within GenBank  
400 accession NM\_027008.2.

401 pUASTattB-Myc-KCTD17.3 (pNS349) and pUASTattB-Myc-KCTD17.2 (pNS350) were  
402 generated similarly to pNS346, substituting NheI-XhoI KCTD17 fragments liberated from the PCR  
403 amplification products of mouse brain cDNA and primers oNS290 and oNS291. The smaller and  
404 larger NheI-XhoI fragments respectively corresponding to KCTD17.3 and KCTD17.2 were gel  
405 purified and ligated separately. Amplified KCTD17.3 and KCTD17.2 sequences are identical to those  
406 within GenBank accession NM\_001289673.1 and NM\_001289672.1 respectively.

407 pUAST-Inc-HA (pNS273) encodes Inc fused to a 1× C-terminal HA epitope  
408 (GSYPYDVPDYA) and was generated by three piece ligation of pUAST BglII-XhoI, a BglII-EcoRI  
409 *inc* fragment liberated from pNS272 [11], and an EcoRI-XhoI HA fragment generated by  
410 phosphorylating and annealing oligonucleotides oNS191 and oNS192.

411 pUASTattB-3×FLAG-Inc (pNS404) encodes a 3× N-terminal FLAG epitope  
412 (MDYKDDDDKGSSDYKDDDDKGSDYKDDDDKAS) fused to Inc and was generated by three piece  
413 ligation of EcoRI-XhoI digested pUASTattB, an EcoRI-NheI 3×FLAG fragment liberated from the  
414 PCR amplification product of pNS311 template and primers ACF and oNS241, and a NheI-XhoI *inc*  
415 fragment liberated from pNS351.

416  
417 Vectors for expression in S2 cells were as follows:

418 pAc5.1-3×Myc-Inc (pNS351) encodes a 3× N-terminal Myc epitope  
419 (MEQKLISEEDLGSEQKLISEEDLGSEQKLISEEDLAS) fused to Inc in a derivative of pAc5.1/V5-

420 HisA (ThermoFisher), and was generated by ligating NheI-XhoI digested pNS309 [11] to a NheI-XhoI  
421 *inc* fragment prepared as for pNS346.

422 pAc5.1-3×Myc-KCTD2 (pNS352) was generated similarly to pNS351, substituting a NheI-  
423 XhoI KCTD2 fragment prepared as for pNS347.

424 pAc5.1-3×Myc-KCTD5 (pNS353) was generated similarly to pNS351, substituting a NheI-  
425 XhoI KCTD5 fragment prepared as for pNS348.

426 pAc5.1-3×Myc-KCTD17.3 (pNS391) was generated by ligating NheI-XhoI digested pNS309  
427 to a NheI-XhoI KCTD17.3 fragment liberated from the PCR amplification product of pNS354  
428 template and primers oNS290 and oNS612. pNS354 was generated by ligating NheI-XhoI digested  
429 pNS309 and the NheI-XhoI KCTD17.3 fragment prepared as for pNS349.

430 pAc5.1-3×Myc-KCTD17.2 (pNS392) was generated by ligating NheI-XhoI digested pNS309  
431 to a NheI-XhoI KCTD17.2 fragment liberated from the PCR amplification product of pNS355  
432 template and primers oNS290 and oNS955. pNS355 was generated by ligating NheI-XhoI digested  
433 pNS309 and the NheI-XhoI KCTD17.2 fragment prepared as for pNS350.

434 pAc5.1-3×HA-*Inc* (pNS402) was generated by ligating NheI-XhoI digested pNS310 [11] and  
435 a NheI-XhoI *inc* fragment liberated from pNS351.

436 pAc5.1-3×HA-mCul3 (pNS367) encodes a 3× N-terminal HA epitope  
437 (MYPYDVPDYAGSYPYDVPDYAGSYPYDVPDYAAS) fused to mouse Cul3, and was generated  
438 by three piece ligation of NheI-NotI digested pNS310 [11], a 0.3 kb NheI-HindIII 5' mCul3 fragment  
439 liberated from the PCR amplification product of pCMV-SPORT6-mCul3 template (ThermoFisher,  
440 GenBank accession BC027304) and primers oNS313 and oNS314, and a 2.2 kb HindIII-NotI 3'  
441 mCul3 fragment generated by digesting pCMV-SPORT6-mCul3 with *Ava*I, blunting with T4 DNA  
442 polymerase, ligating a NotI linker, and digesting with HindIII-NotI.

443 pAc5.1-3×FLAG-Cul3 (pNS403) encodes a 3× N-terminal FLAG epitope fused to *Drosophila*  
444 Cul3 and was generated by ligating NheI-NotI digested pNS311 and a NheI-NotI Cul3 fragment  
445 liberated from pNS314 [11]. pNS311 contains a N-terminal 3×FLAG tag and was generated from

446 pNS298, a derivative of pAc5.1/V5-HisA that contains a C-terminal 3×FLAG tag. To construct  
447 pNS298, oligonucleotides oNS234 and oNS235 were phosphorylated, annealed, and cloned into XhoI-  
448 XbaI digested pAc5.1/V5-HisA. To construct pNS311, the EcoRI-NotI fragment liberated from the  
449 PCR amplification product of pNS298 template and primers oNS240 and oNS241 was ligated to  
450 EcoRI-NotI digested pAc5.1/V5-HisA.

451 pAc5.1-*Inc*-GFP (pNS275) encodes *Inc* fused at its C-terminus to GFP and was generated by  
452 three piece ligation of EcoRI-NotI digested pAc5.1/V5-HisA, an EcoRI-BamHI *inc* fragment liberated  
453 from pNS273, and a BamHI-NotI EGFP fragment liberated from pEGFP-N3 (Clontech).

454

455 Mammalian expression vectors were as follows:

456 pcDNA3.1-3×Myc-*Inc* (pNS358) was generated by ligating NheI-XhoI digested pcDNA3.1(+)  
457 (ThermoFisher) with a SpeI-XhoI 3×Myc-*Inc* fragment liberated from pNS351.

458 pcDNA3.1-3×Myc-KCTD2 (pNS359) was generated similarly to pNS358, substituting a SpeI-  
459 XhoI 3×Myc-KCTD2 fragment liberated from pNS352.

460 pcDNA3.1-3×Myc-KCTD5 (pNS360) was generated by ligating EcoRI-XhoI digested  
461 pcDNA3.1(+) with a EcoRI-XhoI 3×Myc-KCTD5 fragment liberated from pNS353.

462 pcDNA3.1-3×Myc-KCTD17.3 (pNS393) was generated by three piece ligation of EcoRI-  
463 XhoI digested pcDNA3.1(+), an EcoRI-NheI 3×Myc fragment liberated from the PCR amplification  
464 product of pNS351 template and primers ACF and oNS318, and a NheI-XhoI KCTD17.3 fragment  
465 liberated from the PCR amplification product of pNS354 template and primers oNS290 and oNS612.

466 pcDNA3.1-3×Myc-KCTD17.2 (pNS394) was generated similarly to pNS393, substituting a  
467 NheI-XhoI KCTD17.2 fragment liberated from the PCR amplification product of pNS355 template  
468 and primers oNS290 and oNS955.

469 pcDNA3.1-3×HA-Cul3 (pNS365) was generated by ligating EcoRI-NotI digested  
470 pcDNA3.1(+) with the EcoRI-NotI 3×HA-Cul3 fragment from pNS314 [11].

471 pcDNA3.1-3×HA-mCul3 (pNS369) was generated by ligating KpnI-NotI digested  
472 pcDNA3.1(+) with the KpnI-NotI 3×HA-mCul3 fragment liberated from pNS367.  
473 pcDNA3.1-3×FLAG-Inc (pNS395) encodes a 3× N-terminal FLAG epitope fused to Inc, and  
474 was generated by three piece ligation of EcoRI-XhoI digested pcDNA3.1(+), an EcoRI-NheI 3×FLAG  
475 fragment liberated from the PCR amplification product of pNS386 template and primers ACF and  
476 oNS318, and the NheI-XhoI *inc* fragment liberated from pNS351. pNS386 was generated by ligating  
477 NheI-XhoI digested pNS311 and an NheI-XhoI *inc* fragment liberated from pNS351.  
478 pcDNA3.1-3×FLAG-KCTD2 (pNS396) was generated similarly to pNS395, substituting an  
479 NheI-XhoI KCTD2 fragment liberated from pNS352.  
480 pcDNA3.1-3×FLAG-KCTD5 (pNS397) was generated similarly to pNS395, substituting an  
481 NheI-XhoI KCTD5 fragment liberated from pNS353.  
482 pcDNA3.1-3×FLAG-KCTD17.2 (pNS398) was generated similarly to pNS395, substituting  
483 the NheI-XhoI fragment liberated from the PCR amplification product of pNS355 template and  
484 primers oNS290 and oNS955.  
485 pcDNA3.1-3×FLAG-KCTD17.3 (pNS399) was generated similarly to pNS395, substituting  
486 the NheI-XhoI fragment liberated from the PCR amplification product of pNS354 template and  
487 primers oNS290 and oNS612.  
488 pEGFPN3-Inc (pNS279) encodes Inc fused at its C-terminus to GFP and was generated by  
489 ligating EcoRI-BamHI digested pEGFP-N3 (Clontech) and an EcoRI-BamHI *inc* fragment liberated  
490 from pNS273.

491

## 492 **Oligonucleotides**

493 Oligonucleotides used in this work, listed 5' to 3', are as follows:

oNS119 GTCCGCGCGATTCCCTTGCTTGC

oNS191 AATTTTGGGAATTGGATCCTACCCCTACGATGTGCCCGATTACGCCTAAC

oNS192 TCGAGTTAGGCGTAATCGGGCACATCGTAGGGGTAGGATCCAATTCCCAA  
oNS198 ACTGGGATCCATCCGCCTGTGTGGCTGGGACGG  
oNS234 TCGAGGCTAGCGACTACAAGGATGATGACGATAAGGGCTCCGATTACAAGGAC  
GACGATGATAAGGGATCCGATTACAAGGATGATGACGACAAGTGAT  
oNS235 CTAGATCACTTGTCGTCATCATCCTTGTAATCGGATCCCTTATCATCGTCGTCCT  
TGTAATCGGAGCCCTTATCGTCATCATCCTTGTAGTCGCTAGCC  
oNS240 ACTGGAATTCCGCGGCAACATGGACTACAAGGATGATGACGATAAGGGC  
oNS241 ACTGGCGGCCGCTCCTAGGGTGCTAGCCTTGTCGTCATCATCCTTGTAATCGGAT  
oNS254 GTGCGCCAAGTGTCTGAAGAACA ACTGG  
oNS255 GATGAGCTGCCGAGTCAATCGATACAGTC  
oNS277 ACGTGCTAGCATGAGCACGGTGTT CATAAACTCGC  
oNS283 GATCTCAACATGGAGCAGAAGCTGATCAGCGAGGAGGATCTGG  
oNS284 CTAGCCAGATCCTCCTCGCTGATCAGCTTCTGCTCCATGTTGA  
oNS285 ACGTGCTAGCTCGAGGGGTTGTGTGTGAATATATAGCGCGA  
oNS286 ACGTGCTAGCATGGCGGAGCTGCAGCTGG  
oNS287 ACGTGCTAGCTCGAGCCGCTTACATTCGAGAGCCTCTCTCC  
oNS288 ACGTGCTAGCATGGCGGAGAATCACTGCGAGCTG  
oNS289 ACGTGCTAGCTCGAGCCTCACATCCTTGAGCCCCGTTTC  
oNS290 ACGTGCTAGCATGCAGACAACGCGGCCGGCG  
oNS291 ACGTGCTAGCTCGAGCCCAAGGCAGGAGTGAGTCTCAGC  
oNS313 ACGTGCTAGCATGTCTGAATCTGAGCAAAGGCACGGG  
oNS314 GCCGAAGATGATCCCTAATACACCCATAACCG  
oNS318 ACGTCTCGAGTTACTGCGTCACGTTGTAGAACTC  
oNS612 ACGTCTCGAGTCACATCCGGGTGCCTCTGGCTT  
oNS955 ACGTCTCGAGTCACTGCAAGCTCAGGCTTGGGTCTG

oNS1204 TAATACGACTCACTATAGGGGAAGGCAAGAGAGCAATCGGC  
oNS1205 GCGATTTAGGTGACTACTATAGAAGAAAAGGCTGCAGAAGCAGTTAC  
oNS1207 TAATACGACTCACTATAGGGGGCTCAAGGATGTGAGGAATGCTGAG  
oNS1208 GCGATTTAGGTGACTACTATAGAAGCAGCCTCTATCCCAGGCACAAC  
oNS1213 TAATACGACTCACTATAGGGTTACAAGCCAGAGGCACCCGGA  
oNS1214 GCGATTTAGGTGACTACTATAGAAGCAGCTCAACCCGTTACACCTGTC  
ACF GACACAAAGCCGCTCCATCAG  
attP2-5' CACTGGCACTAGAACAAAAGCTTTGGCG

494

## 495 **Cell culture and biochemistry**

496 293T cells were cultured in DMEM containing 10% FBS, penicillin, and streptomycin, and  
497 transfected with Lipofectamine 2000 (ThermoFisher) according to the manufacturers protocol. S2 cells  
498 were cultured in S2 media containing 10% FBS, penicillin, and streptomycin, and were transfected  
499 with Effectene (Qiagen) as described previously [11]. For both 293T and S2 cells, transfections were  
500 performed in 6 well or 12 well plates for ~24h until liposome-containing media was replaced with  
501 fresh culture media. Cells or coverslips were harvested for lysis or immunohistochemistry 36-48h after  
502 transfections were initiated. For transfections involving more than one plasmid, an equal amount of  
503 each was used. Rat cortical neurons were cultured on poly-D-lysine coated coverslips and transfected  
504 with calcium phosphate at 7 days in vitro (DIV) as described previously [67].

505 For co-immunoprecipitations from 293T cells, samples were lysed with ice-cold RIPA buffer  
506 (50 mM Tris-Cl pH 7.6, 150 mM NaCl, 50 mM NaF, 2 mM EDTA, 0.5% sodium deoxycholate, 1%  
507 NP40, 0.1% SDS) containing protease inhibitor (Sigma, P8340). For co-immunoprecipitation of Inc  
508 family members from S2 cells, samples were lysed with ice-cold NP40 buffer (50 mM Tris pH 7.6,  
509 150mM NaCl, 0.5% NP40) containing protease inhibitors or RIPA buffer as above; for S2 cell co-  
510 immunoprecipitations involving Cul3, ice-cold NP40 buffer was used. Protein extracts were  
511 quantitated in duplicate (BioRad, 5000111) and 160-400 µg (293T) or 800-1000 µg (S2) was

512 immunoprecipitated with 20  $\mu$ l (50% slurry) of anti-FLAG (Sigma, F2426) or anti-HA (Sigma,  
513 E6779) affinity gel for 1 hr nutating at 4°C. Samples were then washed 4 $\times$ 5 min at 4°C with lysis  
514 buffer, denatured in SDS sample buffer, separated on Tris SDS-PAGE gels, and transferred to  
515 nitrocellulose. Membranes were blocked for 1 hr at room temperature or 4°C overnight in LI-COR  
516 Odyssey buffer (LI-COR, 927-40000) or 1% casein in PBS. Membranes were subsequently incubated  
517 in blocking buffer containing 0.1% Tween 20 and the appropriate primary antibodies: rabbit anti-Myc  
518 (1:2,000, Sigma, C3956), mouse anti-FLAG (1:2,000, Sigma, F1804), rat anti-HA (1:1,000-1:2,000,  
519 Roche, 11867431001), rabbit anti-Cul3 (1:1,000, Bethyl Laboratories, A301-109A), and rabbit anti-  
520 KCTD5 (1:2,000, Proteintech, 15553-1-AP). After washing 4 $\times$ 5 min in a solution containing 150 mM  
521 NaCl, 10mM Tris pH 7.6, and 0.1% Tween 20 (TBST), membranes were incubated in the dark for 30  
522 min at room temperature with appropriate secondary antibodies, all diluted 1:30,000 in blocking buffer  
523 containing 0.1% Tween 20 and 0.01% SDS: Alexa 680 donkey anti-rabbit (Life Technologies,  
524 A10043), Alexa 790 anti-mouse (Life Technologies, A11371), and Alexa 790 anti-rat (Jackson  
525 ImmunoResearch, 712-655-153). Membranes were then washed 4 $\times$ 5 min in TBST, 1 $\times$ 5 min in TBS,  
526 and imaged on a Li-Cor Odyssey CLx instrument.

527 Fly protein extracts were prepared from whole animals or from sieved heads by manual pestle  
528 homogenization in ice-cold NP40 lysis buffer supplemented with protease inhibitors. 50  $\mu$ g was  
529 separated on Tris-SDS-PAGE gels and blotted as described above. Primary antibodies were mouse  
530 anti-Myc (1:1,000, BioXCell, BE0238; or 1:1,000, Cell Signaling Technology, 2276), rabbit anti-  
531 tubulin (1:30,000, VWR, 89364-004), or mouse anti-actin (1:1,000, Developmental Studies  
532 Hybridoma Bank (DSHB), JLA20). Secondary antibodies were Alexa 680 donkey anti-rabbit, Alexa  
533 680 anti-mouse (Life Technologies, A10038), and Alexa 790 anti-rabbit (Life Technologies, A11374).

534 Mouse and rat brain extracts not used for synaptosome preparations were prepared by  
535 homogenizing brains in ice-cold NP40 lysis buffer supplemented with protease inhibitors. Extracts  
536 were separated with SDS-PAGE and blotted as described above.



537 Synaptosomes were prepared from rat brain essentially as described [68], and probed with  
538 rabbit anti-Cul3 (1:1,000), mouse anti-Actin (1:1,000), rabbit anti-KCTD5 (1:2,000), guinea-pig anti-  
539 synapsin (1:1,000, Synaptic Systems, 106 004), and mouse anti-PSD95 (1:1,000, Neuromab, 75-028).  
540 Alexa 680 and Alexa 790 secondary antibodies were used as described above.

541

## 542 **Immunohistochemistry and microscopy**

543 Rat cortical neurons transfected at 7 DIV were processed at 13 DIV for  
544 immunohistochemistry. Samples were fixed for 15 min with ice-cold 4% paraformaldehyde in  
545 Dulbecco's PBS containing 4 mM EGTA and 4% sucrose, and subsequently permeabilized for 10 min  
546 in PBS containing 0.5% normal donkey serum (Lampire Biological, 7332100) and 0.1% Triton X-100.  
547 Samples were then blocked at room temperature for 30 min in PBS containing 7.5% normal donkey  
548 serum and 0.05% Triton X-100, incubated overnight at 4°C in primary antibody cocktail prepared in  
549 PBS containing 5% normal donkey serum and 0.05% Triton X-100, and washed 3×5 min in PBS at  
550 room temperature. Secondary antibody cocktails were prepared similarly and incubated with samples  
551 at room temperature for 30-40 min in the dark. Samples were then washed 3×5 min in PBS at room  
552 temperature and mounted on microscope slides in Vectashield (Vector Labs, H-1000). Primary  
553 antibodies were rabbit anti-Myc (1:200), mouse anti-PSD95 (1:1,000), and guinea pig anti-synapsin  
554 (1:1,000). Secondary antibodies, all diluted at 1:1,000, were Alexa 488 donkey anti-rabbit (Life  
555 Technologies, A21206), Alexa 488 donkey anti-guinea pig (Jackson ImmunoResearch, 706-545-148),  
556 Alexa 568 donkey anti-mouse (Life Technologies, A10037), and Alexa 568 donkey anti-rabbit (Life  
557 Technologies, A10042).

558 Immunohistochemistry for 293T cells was performed similarly; cells were plated on poly-L-  
559 lysine treated coverslips and cultured and transfected as described above. 0.4  $\mu$ g/ml DAPI was  
560 included in the penultimate wash prior to mounting coverslips on microscope slides.

561 For immunohistochemistry of adult fly brains, whole animals were fixed with 4%  
562 paraformaldehyde in PBS containing 0.2% Triton X-100 (PBST) for 3 hr at 4°C, and subsequently  
563 washed 3×15 min at room temperature with PBST. Brains were dissected in ice-cold PBST, incubated  
564 for 30 min at room temperature in blocking solution containing PBST and 5% normal donkey serum,  
565 and incubated overnight at 4°C in primary antibody cocktail diluted in blocking solution. After 3×15  
566 min washes in PBST at room temperature, samples were incubated in secondary antibody cocktail in  
567 blocking solution for 1-3 days at 4°C, washed 3×15 min at room temperature with PBST, and mounted  
568 on microscope slides in Vectashield. Primary antibodies were mouse anti-FLAG (1:100), rabbit anti-  
569 GFP (1:3,000; Life Technologies, A11122), mouse anti-GFP (1:1,000, DSHB, G1), mouse anti-PDF  
570 (1:500, DSHB, C7), rabbit anti-CRZ (1:1,000, [69]), rabbit anti-DsRed (1:1,000, Clontech, 632496),  
571 and mouse anti-Myc (1:100, BioXCell, BE0238). Secondary antibodies, all used at 1:1,000, were  
572 Alexa 488 donkey anti-mouse (Life Technologies, A21202), Alexa 488 donkey anti-rabbit, Alexa 568  
573 donkey anti-mouse, and Alexa 568 donkey anti-rabbit.

574 For immunohistochemistry of larval brains and neuromuscular junctions, wandering third  
575 instar larvae were dissected in PBS and pinned to 35mm Sylgard-coated petri dishes. Where  
576 experiments required larvae of a specific sex, gonads were identified prior to dissection by visual  
577 inspection of animals under PBS immersion as described [70]. Larval filets were fixed for 30 min at  
578 room temperature in 4% paraformaldehyde in PBS, and subsequently rinsed twice and washed 3×20  
579 min in PBST. Samples were blocked in 5% normal donkey serum in PBST at room temperature for 30  
580 min and incubated overnight at 4°C in primary antibody cocktail diluted in blocking solution. Samples  
581 were then washed 3×20 min in PBST at room temperature and incubated overnight at 4°C with  
582 secondary antibody cocktail in blocking solution, washed, and mounted in Vectashield. Primary  
583 antibodies were rabbit anti-myc (1:500), mouse anti-Dlg (1:1,000, DSHB, 4F3), and Alexa 647 goat  
584 anti-HRP (1:200, Jackson ImmunoResearch, 123-605-021). Secondary antibodies, used at 1:1000,  
585 were Alexa 488 donkey anti-rabbit and Alexa 568 donkey anti-mouse. Neuromuscular junctions were  
586 imaged with a confocal microscope and z-stacks were captured using 40× or 63× oil objectives at

587 512×512 resolution. Boutons were counted offline using a manual tally counter while manipulating z-  
588 stacks in 3-dimensional space using Zen software (Zeiss); each axon branch was counted separately to  
589 avoid undercounting or duplicate counts and counts were performed three times to ensure consistency.  
590 All bouton counting was performed in a double-blind manner with codes revealed after the entire  
591 experiment was scored.

592 For live imaging of Inc-GFP in S2 cells, cells were cultured on poly-L-lysine coated  
593 coverslips and transfected with Effectene as described above. 48 hours post-transfection, coverslips  
594 were inverted onto a drop of PBS on microscope slides and imaged immediately (within 5 minutes) on  
595 a confocal microscope. For imaging of fixed Inc-GFP signal in S2 cells, coverslips were washed twice  
596 with PBS, fixed for 25 min in PBS containing 4% paraformaldehyde, washed twice in PBS, and  
597 inverted onto drops of Vectashield containing DAPI (Vector) on microscope slides.

598 All imaging was performed on Zeiss LSM510 or LSM800 confocal microscopes.

599

## 600 **Fly stocks and transgenes**

601 *elav<sup>c155</sup>-Gal4* [71] and *inc<sup>1</sup>*, *inc<sup>2</sup>*, and *inc-Gal4* [11] have been described previously. Unless  
602 noted otherwise, all experiments were performed with the X-linked *inc-Gal4* transgene. The *inc<sup>1</sup> inc-*  
603 *Gal4* stock was generated by meiotic recombination between isogenic *inc<sup>1</sup>* and *inc-Gal4* chromosomes  
604 and verified with duplex PCR using primers oNS254 and oNS255 for Gal4 and oNS119 and oNS198  
605 for *inc<sup>1</sup>*. pUASTattB-based vectors generated in this study were integrated at *attP2* [25] with phiC31  
606 recombinase (BestGene); integration was verified by PCR using primer attP2-5' paired with oNS277,  
607 oNS286, oNS288, or oNS290 for Inc, KCTD2, KCTD5, and KCTD17 respectively. All transgenes  
608 were backcrossed eight generations to Bloomington stock 5905, an isogenic *w<sup>1118</sup>* stock described  
609 elsewhere as iso31 [72].

610

## 611 **Sleep analysis**

612 Crosses were set with five virgin females and three males on cornmeal, agar, and molasses  
613 food. One to four day old male flies eclosing from LD-entrained cultures raised at 25°C were loaded in  
614 glass tubes containing cornmeal, agar, and molasses food. Animals were monitored for 5-7 days at  
615 25°C in LD cycles using DAM2 monitors (Trikinetics). The first 36-48 hours of data was discarded to  
616 permit animals to acclimate to glass tubes, and an integral number of days of data (3-5) were analyzed  
617 using custom Matlab software as described previously [11]. Locomotor data were collected in 1 min  
618 bins, and sleep was defined by inactivity for 5 minutes or more; a given minute was assigned as sleep  
619 if an animal was inactive for that minute and the preceding four minutes. Dead animals were excluded  
620 from analysis by a combination of automated filtering and visual inspection of locomotor traces.

621

## 622 **Electrophysiology**

623 Electrophysiological recordings were performed from abdominal segment 3 muscle 6/7 of  
624 third instar larvae as described in [73].

625

## 626 **Statistics**

627 One-way ANOVA and Tukey post-hoc tests were used for comparisons of total sleep, daytime  
628 sleep, nighttime sleep, sleep bout number, and bouton number. Nonparametric Kruskal-Wallis tests  
629 and Dunn's post hoc tests were used for comparisons of sleep bout length. Unpaired two-sided  
630 Student's t-tests were used for comparisons of all electrophysiological parameters.

631

## 632 **Sequence alignments**

633 Alignments were performed with Clustal Omega 1.2.1 and BOXSHADE. GenBank accession  
634 numbers for transcript variants referred to in Figures S1 and S2 are: KCTD2, NM\_183285; KCTD5,  
635 NM\_027008; KCTD17.1, NM\_001289671; KCTD17.2, NM\_001289672; KCTD17.3,  
636 NM\_001289673; KCTD17.4, NR\_110357; KCTD17.v1, XM\_006521460; KCTD17.v2,

637 XM\_011245739; KCTD17.v3, XM\_011245740; KCTD17.v4, XM\_011245741; KCTD17.v5,  
638 XM\_006521461; KCTD17.v6, XM\_006521462; KCTD17.v7, XM\_011245742; KCTD17.v8,  
639 XM\_006521465; hKCTD17.2, NM\_024681.

640 **Author contributions**

641 Q.L. generated constructs and stocks, and performed behavioral assays, transfections,  
642 immunoprecipitations, and immunohistochemical analysis; D.A.K. performed transfections,  
643 immunoprecipitations, immunohistochemical analysis, and prepared synaptosomes; H.A.M.H.  
644 performed behavioral assays and immunohistochemical analysis; T.Y. performed  
645 immunohistochemical analysis; S.S. derived cortical cultures and prepared synaptosomes; R.P.M.  
646 performed in situ hybridizations; C.A.F. performed all electrophysiological recordings; N.S. generated  
647 constructs and stocks, and performed behavioral assays, transfections, immunoprecipitations, and  
648 immunohistochemical analysis. All authors contributed to the design and analysis of experiments. N.S  
649 wrote the manuscript with contributions from Q.L.

## 650 **Acknowledgements**

651           We thank G. Fishell and R. Tsien for sharing facilities; B. Schulman for discussions of Cul3  
652   adaptors; and J. Dasen, N. Ringstad, M. Shirasu-Hiza, J. Treisman, R. Tsien, and members of the  
653   Stavropoulos lab for comments on the manuscript and discussions. N.S. thanks M. Young for support  
654   during the initiation of this work. This research was supported by an International Student Research  
655   Fellowship from the Howard Hughes Medical Institute (Q.L.), by NIH NS062738 and a Whitehall  
656   foundation grant (C.A.F.), and by grants from the Whitehall, Alfred P. Sloan, Leon Levy, and Mathers  
657   Foundations, a NARSAD Young Investigator Award from the Brain and Behavior Research  
658   Foundation, a New York University Whitehead Fellowship, and the J. Christian Gillin, M.D. Research  
659   Award from the Sleep Research Society Foundation (N.S.).

## 660 **References**

- 661 1. Campbell SS, Tobler I. Animal sleep: a review of sleep duration across phylogeny. *Neurosci*  
662 *Biobehav Rev.* 1984;8: 269–300.
- 663 2. Joiner WJ. Unraveling the Evolutionary Determinants of Sleep. *Curr Biol.* 2016;26: R1073–  
664 R1087. doi:10.1016/j.cub.2016.08.068
- 665 3. Borbély AA. A two process model of sleep regulation. *Hum Neurobiol.* 1982;1: 195–204.
- 666 4. Young MW, Kay SA. Time zones: a comparative genetics of circadian clocks. *Nat Rev Genet.*  
667 2001;2: 702–715. doi:10.1038/35088576
- 668 5. Lowrey PL, Takahashi JS. Genetics of circadian rhythms in Mammalian model organisms. *Adv*  
669 *Genet.* 2011;74: 175–230. doi:10.1016/B978-0-12-387690-4.00006-4
- 670 6. Reddy P, Zehring WA, Wheeler DA, Pirrotta V, Hadfield C, Hall JC, et al. Molecular analysis  
671 of the period locus in *Drosophila melanogaster* and identification of a transcript involved in  
672 biological rhythms. *Cell.* 1984;38: 701–710.
- 673 7. Bargiello TA, Jackson FR, Young MW. Restoration of circadian behavioural rhythms by gene  
674 transfer in *Drosophila*. *Nature.* 1984;312: 752–754.
- 675 8. Kloss B, Price JL, Saez L, Blau J, Rothenfluh A, Wesley CS, et al. The *Drosophila* clock gene  
676 double-time encodes a protein closely related to human casein kinase Iepsilon. *Cell.* 1998;94:  
677 97–107.
- 678 9. Toh KL, Jones CR, He Y, Eide EJ, Hinz WA, Virshup DM, et al. An hPer2 phosphorylation  
679 site mutation in familial advanced sleep phase syndrome. *Science.* 2001;291: 1040–1043.
- 680 10. Xu Y, Padiath QS, Shapiro RE, Jones CR, Wu SC, Saigoh N, et al. Functional consequences of  
681 a CKIdelta mutation causing familial advanced sleep phase syndrome. *Nature.* 2005;434: 640–  
682 644. doi:10.1038/nature03453
- 683 11. Stavropoulos N, Young MW. insomniac and Cullin-3 regulate sleep and wakefulness in  
684 *Drosophila*. *Neuron.* 2011;72: 964–976. doi:10.1016/j.neuron.2011.12.003
- 685 12. Pfeiffenberger C, Allada R. Cul3 and the BTB adaptor insomniac are key regulators of sleep  
686 homeostasis and a dopamine arousal pathway in *Drosophila*. *PLoS Genet.* 2012;8: e1003003.  
687 doi:10.1371/journal.pgen.1003003
- 688 13. Stogios PJ, Downs GS, Jauhal JJS, Nandra SK, Privé GG. Sequence and structural analysis of  
689 BTB domain proteins. *Genome Biol.* 2005;6: R82. doi:10.1186/gb-2005-6-10-r82
- 690 14. Xu L, Wei Y, Reboul J, Vaglio P, Shin T-H, Vidal M, et al. BTB proteins are substrate-specific  
691 adaptors in an SCF-like modular ubiquitin ligase containing CUL-3. *Nature.* 2003;425: 316–  
692 321. doi:10.1038/nature01985
- 693 15. Pintard L, Willis JH, Willems A, Johnson J-LF, Srayko M, Kurz T, et al. The BTB protein  
694 MEL-26 is a substrate-specific adaptor of the CUL-3 ubiquitin-ligase. *Nature.* 2003;425: 311–  
695 316. doi:10.1038/nature01959



- 696 16. Geyer R, Wee S, Anderson S, Yates J, Wolf DA. BTB/POZ domain proteins are putative  
697 substrate adaptors for cullin 3 ubiquitin ligases. *Mol Cell*. 2003;12: 783–790.
- 698 17. Furukawa M, He YJ, Borchers C, Xiong Y. Targeting of protein ubiquitination by BTB-Cullin  
699 3-Roc1 ubiquitin ligases. *Nat Cell Biol*. 2003;5: 1001–1007. doi:10.1038/ncb1056
- 700 18. Zhuang M, Calabrese MF, Liu J, Waddell MB, Nourse A, Hammel M, et al. Structures of  
701 SPOP-substrate complexes: insights into molecular architectures of BTB-Cul3 ubiquitin ligases.  
702 *Mol Cell*. 2009;36: 39–50. doi:10.1016/j.molcel.2009.09.022
- 703 19. Errington WJ, Khan MQ, Bueler SA, Rubinstein JL, Chakrabartty A, Privé GG. Adaptor  
704 protein self-assembly drives the control of a cullin-RING ubiquitin ligase. *Structure*. 2012;20:  
705 1141–1153. doi:10.1016/j.str.2012.04.009
- 706 20. Bayón Y, Trinidad AG, la Puerta de ML, Del Carmen Rodríguez M, Bogetz J, Rojas A, et al.  
707 KCTD5, a putative substrate adaptor for cullin3 ubiquitin ligases. *FEBS J*. 2008;275: 3900–  
708 3910. doi:10.1111/j.1742-4658.2008.06537.x
- 709 21. Dementieva IS, Tereshko V, McCrossan ZA, Solomaha E, Araki D, Xu C, et al. Pentameric  
710 assembly of potassium channel tetramerization domain-containing protein 5. *J Mol Biol*.  
711 2009;387: 175–191. doi:10.1016/j.jmb.2009.01.030
- 712 22. Weger S, Hammer E, Götz A, Heilbronn R. Identification of a cytoplasmic interaction partner  
713 of the large regulatory proteins Rep78/Rep68 of adeno-associated virus type 2 (AAV-2).  
714 *Virology*. 2007;362: 192–206. doi:10.1016/j.virol.2006.12.010
- 715 23. Rutz N, Heilbronn R, Weger S. Interactions of cullin3/KCTD5 complexes with both  
716 cytoplasmic and nuclear proteins: Evidence for a role in protein stabilization. *Biochem Biophys  
717 Res Commun*. 2015;464: 922–928. doi:10.1016/j.bbrc.2015.07.069
- 718 24. Kasahara K, Kawakami Y, Kiyono T, Yonemura S, Kawamura Y, Era S, et al. Ubiquitin-  
719 proteasome system controls ciliogenesis at the initial step of axoneme extension. *Nat Comms*.  
720 2014;5: 5081. doi:10.1038/ncomms6081
- 721 25. Groth AC, Fish M, Nusse R, Calos MP. Construction of transgenic *Drosophila* by using the  
722 site-specific integrase from phage phiC31. *Genetics*. 2004;166: 1775–1782.
- 723 26. Cirelli C, Bushey D, Hill S, Huber R, Kreber R, Ganetzky B, et al. Reduced sleep in  
724 *Drosophila* Shaker mutants. *Nature*. 2005;434: 1087–1092. doi:10.1038/nature03486
- 725 27. Zimmerman JE, Chan MT, Jackson N, Maislin G, Pack AI. Genetic background has a major  
726 impact on differences in sleep resulting from environmental influences in *Drosophila*. *Sleep*.  
727 2012;35: 545–557. doi:10.5665/sleep.1744
- 728 28. Ganguly-Fitzgerald I, Donlea J, Shaw PJ. Waking experience affects sleep need in *Drosophila*.  
729 *Science*. 2006;313: 1775–1781. doi:10.1126/science.1130408
- 730 29. Itoh K, Wakabayashi N, Katoh Y, Ishii T, Igarashi K, Engel JD, et al. Keap1 represses nuclear  
731 activation of antioxidant responsive elements by Nrf2 through binding to the amino-terminal  
732 Neh2 domain. *Genes Dev*. 1999;13: 76–86.

- 733 30. Nagai Y, Kojima T, Muro Y, Hachiya T, Nishizawa Y, Wakabayashi T, et al. Identification of  
734 a novel nuclear speckle-type protein, SPOP. *FEBS Letters*. 1997;418: 23–26.
- 735 31. Xue F, Cooley L. kelch encodes a component of intercellular bridges in *Drosophila* egg  
736 chambers. *Cell*. 1993;72: 681–693.
- 737 32. Maerki S, Olma MH, Staubli T, Steigemann P, Gerlich DW, Quadroni M, et al. The Cul3-  
738 KLHL21 E3 ubiquitin ligase targets aurora B to midzone microtubules in anaphase and is  
739 required for cytokinesis. *J Cell Biol*. 2009;187: 791–800. doi:10.1083/jcb.200906117
- 740 33. Schaefer H, Rongo C. KEL-8 is a substrate receptor for CUL3-dependent ubiquitin ligase that  
741 regulates synaptic glutamate receptor turnover. *Mol Biol Cell*. 2006;17: 1250–1260.  
742 doi:10.1091/mbc.E05-08-0794
- 743 34. Choi YJ, Lee G, Hall JC, Park JH. Comparative analysis of *Corazonin*-encoding genes (*Crz*'s)  
744 in *Drosophila* species and functional insights into *Crz*-expressing neurons. *J Comp Neurol*.  
745 2005;482: 372–385. doi:10.1002/cne.20419
- 746 35. Renn SC, Park JH, Rosbash M, Hall JC, Taghert PH. A pdf neuropeptide gene mutation and  
747 ablation of PDF neurons each cause severe abnormalities of behavioral circadian rhythms in  
748 *Drosophila*. *Cell*. 1999;99: 791–802.
- 749 36. Zhang YQ, Rodesch CK, Broadie K. Living synaptic vesicle marker: synaptotagmin-GFP.  
750 *Genesis*. 2002;34: 142–145. doi:10.1002/gene.10144
- 751 37. Nicolai LJJ, Ramaekers A, Raemaekers T, Drozdzecki A, Mauss AS, Yan J, et al. Genetically  
752 encoded dendritic marker sheds light on neuronal connectivity in *Drosophila*. *Proc Natl Acad*  
753 *Sci USA*. 2010;107: 20553–20558. doi:10.1073/pnas.1010198107
- 754 38. Helfrich-Förster C, Shafer OT, Wülbeck C, Grieshaber E, Rieger D, Taghert P. Development  
755 and morphology of the clock-gene-expressing lateral neurons of *Drosophila melanogaster*. *J*  
756 *Comp Neurol*. 2007;500: 47–70. doi:10.1002/cne.21146
- 757 39. Menon KP, Carrillo RA, Zinn K. Development and plasticity of the *Drosophila* larval  
758 neuromuscular junction. *Wiley Interdiscip Rev Dev Biol*. 2013;2: 647–670.  
759 doi:10.1002/wdev.108
- 760 40. Tononi G, Cirelli C. Sleep and synaptic homeostasis: a hypothesis. *Brain Res Bull*. 2003;62:  
761 143–150.
- 762 41. Vyazovskiy VV, Cirelli C, Pfister-Genskow M, Faraguna U, Tononi G. Molecular and  
763 electrophysiological evidence for net synaptic potentiation in wake and depression in sleep. *Nat*  
764 *Neurosci*. 2008;11: 200–208. doi:10.1038/nn2035
- 765 42. Donlea JM, Ramanan N, Shaw PJ. Use-dependent plasticity in clock neurons regulates sleep  
766 need in *Drosophila*. *Science*. 2009;324: 105–108. doi:10.1126/science.1166657
- 767 43. Bushey D, Tononi G, Cirelli C. Sleep and synaptic homeostasis: structural evidence in  
768 *Drosophila*. *Science*. 2011;332: 1576–1581. doi:10.1126/science.1202839
- 769 44. Yang G, Lai CSW, Cichon J, Ma L, Li W, Gan W-B. Sleep promotes branch-specific

- 770 formation of dendritic spines after learning. *Science*. 2014;344: 1173–1178.  
771 doi:10.1126/science.1249098
- 772 45. Allada R, Siegel JM. Unearthing the phylogenetic roots of sleep. *Curr Biol*. 2008;18: R670–  
773 R679. doi:10.1016/j.cub.2008.06.033
- 774 46. Duda DM, Scott DC, Calabrese MF, Zimmerman ES, Zheng N, Schulman BA. Structural  
775 regulation of cullin-RING ubiquitin ligase complexes. *Curr Opin Struct Biol*. 2011;21: 257–  
776 264. doi:10.1016/j.sbi.2011.01.003
- 777 47. Zhang Q, Zhang L, Wang B, Ou C-Y, Chien C-T, Jiang J. A hedgehog-induced BTB protein  
778 modulates hedgehog signaling by degrading Ci/Gli transcription factor. *Dev Cell*. 2006;10:  
779 719–729. doi:10.1016/j.devcel.2006.05.004
- 780 48. Yi JJ, Ehlers MD. Ubiquitin and protein turnover in synapse function. *Neuron*. 2005;47: 629–  
781 632. doi:10.1016/j.neuron.2005.07.008
- 782 49. Patrick GN. Synapse formation and plasticity: recent insights from the perspective of the  
783 ubiquitin proteasome system. *Curr Opin Neurobiol*. 2006;16: 90–94.  
784 doi:10.1016/j.conb.2006.01.007
- 785 50. Haas KF, Broadie K. Roles of ubiquitination at the synapse. *Biochim Biophys Acta*.  
786 2008;1779: 495–506. doi:10.1016/j.bbagr.2007.12.010
- 787 51. Mabb AM, Ehlers MD. Ubiquitination in postsynaptic function and plasticity. *Annu Rev Cell  
788 Dev Biol*. 2010;26: 179–210. doi:10.1146/annurev-cellbio-100109-104129
- 789 52. Gilestro GF, Tononi G, Cirelli C. Widespread changes in synaptic markers as a function of  
790 sleep and wakefulness in *Drosophila*. *Science*. 2009;324: 109–112.  
791 doi:10.1126/science.1166673
- 792 53. Bushey D, Huber R, Tononi G, Cirelli C. *Drosophila* Hyperkinetic mutants have reduced sleep  
793 and impaired memory. *Journal of Neuroscience*. 2007;27: 5384–5393.  
794 doi:10.1523/JNEUROSCI.0108-07.2007
- 795 54. Jan YN, Jan LY, Dennis MJ. Two mutations of synaptic transmission in *Drosophila*. *Proc R  
796 Soc Lond, B, Biol Sci*. 1977;198: 87–108.
- 797 55. Stern M, Ganetzky B. Altered synaptic transmission in *Drosophila* hyperkinetic mutants.  
798 *Journal of neurogenetics*. 1989;5: 215–228.
- 799 56. Budnik V, Zhong Y, Wu C-F. Morphological plasticity of motor axons in *Drosophila* mutants  
800 with altered excitability. *J Neurosci*. 1990;10: 3754–3768.
- 801 57. Singh K, Ju JY, Walsh MB, DiIorio MA, Hart AC. Deep conservation of genes required for  
802 both *Drosophila melanogaster* and *Caenorhabditis elegans* sleep includes a role for  
803 dopaminergic signaling. *Sleep*. 2014;37: 1439–1451. doi:10.5665/sleep.3990
- 804 58. Boada M, Antúnez C, Ramírez-Lorca R, DeStefano AL, González-Pérez A, Gayán J, et al.  
805 ATP5H/KCTD2 locus is associated with Alzheimer's disease risk. *Molecular Psychiatry*.  
806 2014;19: 682–687. doi:10.1038/mp.2013.86

- 807 59. Mencacci NE, Rubio-Agusti I, Zdebik A, Asmus F, Ludtmann MHR, Ryten M, et al. A  
808 missense mutation in KCTD17 causes autosomal dominant myoclonus-dystonia. *American*  
809 *journal of human genetics*. 2015;96: 938–947. doi:10.1016/j.ajhg.2015.04.008
- 810 60. O’Roak BJ, Vives L, Girirajan S, Karakoc E, Krumm N, Coe BP, et al. Sporadic autism exomes  
811 reveal a highly interconnected protein network of de novo mutations. *Nature*. 2012;485: 246–  
812 250. doi:10.1038/nature10989
- 813 61. Kong A, Frigge ML, Masson G, Besenbacher S, Sulem P, Magnusson G, et al. Rate of de novo  
814 mutations and the importance of father’s age to disease risk. *Nature*. 2012;488: 471–475.  
815 doi:10.1038/nature11396
- 816 62. Codina-Solà M, Rodríguez-Santiago B, Homs A, Santoyo J, Rigau M, Aznar-Lain G, et al.  
817 Integrated analysis of whole-exome sequencing and transcriptome profiling in males with  
818 autism spectrum disorders. *Mol Autism*. 2015;6: 21. doi:10.1186/s13229-015-0017-0
- 819 63. Souders MC, Mason TBA, Valladares O, Bućan M, Levy SE, Mandell DS, et al. Sleep  
820 behaviors and sleep quality in children with autism spectrum disorders. *Sleep*. 2009;32: 1566–  
821 1578.
- 822 64. Bourgeron T. From the genetic architecture to synaptic plasticity in autism spectrum disorder.  
823 *Nat Rev Neurosci*. 2015;16: 551–563. doi:10.1038/nrn3992
- 824 65. Lee S, Hjerling-Leffler J, Zaghera E, Fishell G, Rudy B. The largest group of superficial  
825 neocortical GABAergic interneurons expresses ionotropic serotonin receptors. *Journal of*  
826 *Neuroscience*. 2010;30: 16796–16808. doi:10.1523/JNEUROSCI.1869-10.2010
- 827 66. Bischof J, Maeda RK, Hediger M, Karch F, Basler K. An optimized transgenesis system for  
828 *Drosophila* using germ-line-specific C31 integrases. *Proc Natl Acad Sci USA*. 2007;104:  
829 3312–3317. doi:10.1073/pnas.0611511104
- 830 67. Ma H, Groth RD, Cohen SM, Emery JF, Li B, Hoedt E, et al.  $\gamma$ CaMKII shuttles  $Ca^{2+}$ /CaM to  
831 the nucleus to trigger CREB phosphorylation and gene expression. *Cell*. 2014;159: 281–294.  
832 doi:10.1016/j.cell.2014.09.019
- 833 68. Carlin RK, Grab DJ, Cohen RS, Siekevitz P. Isolation and characterization of postsynaptic  
834 densities from various brain regions: enrichment of different types of postsynaptic densities. *J*  
835 *Cell Biol*. 1980;86: 831–845.
- 836 69. Veenstra JA, Davis NT. Localization of corazonin in the nervous system of the cockroach  
837 *Periplaneta americana*. *Cell Tissue Res*. 1993;274: 57–64.
- 838 70. Kerkis J. The Growth of the Gonads in *DROSOPHILA MELANOGASTER*. *Genetics*.  
839 1931;16: 212–224.
- 840 71. Lin DM, Goodman CS. Ectopic and increased expression of Fasciclin II alters motoneuron  
841 growth cone guidance. *Neuron*. 1994;13: 507–523.
- 842 72. Ryder E, Blows F, Ashburner M, Bautista-Llacer R, Coulson D, Drummond J, et al. The  
843 *DrosDel* collection: a set of P-element insertions for generating custom chromosomal  
844 aberrations in *Drosophila melanogaster*. *Genetics*. 2004;167: 797–813.

845            doi:10.1534/genetics.104.026658

846    73.    Spring AM, Brusich DJ, Frank CA. C-terminal Src Kinase Gates Homeostatic Synaptic  
847            Plasticity and Regulates Fasciclin II Expression at the Drosophila Neuromuscular Junction.  
848            PLoS Genet. 2016;12: e1005886. doi:10.1371/journal.pgen.1005886

849

850 **Figure legends**

851

852 **Fig 1. Expression analysis of mammalian Insomniac orthologs.**

853 **(A)** RT-PCR amplification of KCTD2, KCTD5, and KCTD17 from total mouse brain RNA. The  
854 presence (+) or absence (-) of reverse transcriptase (RT) prior to PCR is indicated. **(B)** Structure of Inc  
855 family members. Conserved BTB (black) and C-terminal domains (grey), KCTD17 alternative variant  
856 residues (dark grey), number of amino acid (aa) residues, and predicted molecular weights are  
857 indicated. **(C)** Western blot of mouse brain and rat cortical culture (CTX) extracts probed with anti-  
858 KCTD5 antibody that recognizes KCTD2, KCTD5, and KCTD17.

859

860 **Fig 2. Insomniac-Cul3 interactions are conserved in flies and mammals.**

861 **(A and B)** Co-immunoprecipitation analysis of epitope-tagged Inc or mouse Inc orthologs co-  
862 expressed (A) with mouse Cul3 (mCul3) in 293T cells or (B) with *Drosophila* Cul3 in Schneider S2  
863 cells.

864

865 **Fig 3. Homomeric and heteromeric interactions of Insomniac family members.**

866 **(A and B)** Co-immunoprecipitation analysis of epitope-tagged Inc and mouse Inc orthologs co-  
867 expressed in a pairwise manner in (A) 293T cells or (B) *Drosophila* S2 cells.

868

869 **Fig 4. Insomniac orthologs functionally substitute for Insomniac and restore sleep to *inc* mutants**  
870 **in vivo.**

871 **(A and B)** Western blots of head (A) or whole animal lysates (B) prepared from indicated genotypes.  
872 Myc-tagged Inc family members are indicated with red dots in (B). **(C and D)** Total sleep per day for  
873 indicated genotypes. Mean  $\pm$  SEM is shown. For (C), n = 37-40; ns, not significant ( $p > 0.05$ ). For (D)  
874 n = 18-157; \*  $p < 0.01$  for comparison to *inc<sup>1</sup> inc-Gal4* animals and not significantly different from

875 wild-type controls; ‡  $p < 0.01$  for comparisons to *inc<sup>1</sup> inc-Gal4* animals and to wild-type controls. **(E)**

876 Population average sleep traces for indicated genotypes.  $n = 56-157$ .

877

878 **Fig 5. Mammalian Insomniac orthologs traffic to neuronal arborizations and synapses.**

879 **(A-C)** Immunohistochemical analysis of rat cortical neurons expressing indicated Myc-tagged

880 proteins. Widefield images of transfected cortical neurons (A), and magnifications of dendrites (B)

881 and axons (C). Scale bars are 50  $\mu\text{m}$  in (A) and 5  $\mu\text{m}$  in (B and C). **(D)** Western blot of total

882 membrane (TM) or synaptosome (SNAP) fractions prepared from rat brain. Note the presence of

883 higher-molecular weight neddylated Cul3.

884

885 **Fig 6. Neuronal localization of Insomniac in vivo.**

886 **(A-G)** Immunohistochemical analysis of adult brains. **(A)** Maximal Z-projection of *inc<sup>1</sup> inc-Gal4* ;

887 *UAS-3 $\times$ FLAG-Inc* / + adult brain stained with anti-FLAG. **(B and C)** *inc-Gal4* ; *UAS-nls-GFP* / +

888 adult brains stained with anti-GFP, anti-CRZ, and anti-PDF antibodies as indicated. **(D)** *crz-Gal4* / + ;

889 *UAS-Myc-Inc* / + brain stained with anti-Myc. Arrows indicate likely presynaptic puncta. **(E)** *crz-Gal4*

890 / + ; *UAS-DenMark UAS-Syt-eGFP* / + brain stained with anti-GFP and anti-dsRed antibodies. **(F)**

891 *pdf-Gal4* ; *UAS-Myc-Inc* / + brain stained with anti-Myc. **(G)** *pdf-Gal4* ; *UAS-DenMark UAS-Syt-*

892 *eGFP* / + brain stained with anti-GFP and anti-dsRed antibodies. **(H and I)** *inc-Gal4* / + ; *UAS-Myc-*

893 *Inc* / + third instar larval ventral ganglion (H) and NMJ 6/7 (I) stained with anti-Myc, anti-HRP, and

894 anti-Dlg as indicated. Scale bars represent 100  $\mu\text{m}$  in (A), 25  $\mu\text{m}$  in (B), 10  $\mu\text{m}$  in (C), 50  $\mu\text{m}$  in (D-

895 H), and 25  $\mu\text{m}$  in (I).

896

897 **Fig 7. Insomniac is essential for synaptic anatomy and function.**

898 **(A)** Female third instar larval abdominal segment 3 muscle 6/7 NMJ are shown from *inc* mutant or

899 isogenic control *w<sup>1118</sup>* animals. Scale bar is 10  $\mu\text{m}$ . **(B)** Total bouton count for indicated genotypes at

900 third instar larval abdominal segment 3 muscle 6/7 NMJ. **(C)** Representative traces of miniature

901 EPSPs for control  $w^{1118}$  and  $inc^1/inc^2$  animals. **(D)** mEPSP amplitude. **(E)** mEPSP frequency. **(F)**  
902 Representative traces of evoked potentials. **(G)** EPSP amplitude. **(H)** Quantal content. For (B), n=40-  
903 43, \*\*  $p < 0.001$  with respect to control. For (D, E, G, and H), n = 11-31, \*  $p < 0.01$ ; ns, not significant  
904 ( $p > 0.05$ ). For all charts, mean  $\pm$  SEM is shown.



## 905 **Supporting information**

### 906 **S1 Fig. In situ hybridization for mouse *Insomniac* orthologs.**

907 **(A)** Allen Brain Atlas in situ hybridization images for KCTD2 and KCTD17. Brain regions with  
908 KCTD2 signal include cortex, hippocampus, striatum, thalamus, hypothalamus, cerebellum, pons, and  
909 medulla. KCTD17 signal is more sparse and is present in cortex, hippocampus, striatum, thalamus,  
910 and cerebellum. KCTD17 probe in these experiments is complementary to KCTD17 transcript  
911 isoforms v1, v2, and v5 (see Fig.S2 and Materials and Methods). **(B)** In situ hybridization of mouse  
912 coronal brain section using a probe complementary to KCTD17 transcript isoforms 1, 2, 3, 4, v2, and  
913 v4. Signal is prominent in the caudate putamen (CPu) and thalamus, as shown for the laterodorsal  
914 thalamic nucleus (LDDM) and laterodorsal ventrolateral thalamus (LDVL), but weak or absent from  
915 cortex (left panel and data not shown), suggesting that cortical KCTD17 signal in (A) may reflect  
916 differential expression of a nonoverlapping subset of KCTD17 transcript isoforms.

917

### 918 **S2 Fig. Sequence analysis of mouse *Insomniac* orthologs.**

919 **(A)** Alignment of Inc and its mouse orthologs. Conserved BTB and C-terminal domains are indicated.  
920 **(B)** Analysis of alternatively spliced forms of mouse KCTD17 (mKCTD17). Proteins represented by  
921 multiple mouse brain cDNA clones in this study are shown alongside additional predicted splice  
922 variants from GenBank (see Materials and Methods). The sequence of a KCTD17 protein encoded by  
923 human KCTD17 transcript isoform 2 (hKCTD17.2) as characterized in Kasahara et al [24] is shown.  
924 Deletion of underlined hKCTD17.2 residues abolishes interaction with trichoplein. Note that residues  
925 implicated in binding trichoplein are absent in KCTD2, KCTD5, KCTD17.2, KCTD17.3, and Inc.  
926 Alternative splicing of KCTD17 in cloned transcripts and predicted variants occurs after a common  
927 exon whose terminal residues are KAK, with color indicating residues shared in different protein  
928 isoforms. Proteins encoded by a subset of predicted mKCTD17 transcript variants (v1, v4, v8) are  
929 shown; analysis of sequence databases suggests that these alternatively spliced variants may be

930 conserved in humans and other vertebrates. Other predicted mKCTD17 variants not shown (v2, v3, v5,  
931 v6, v7) may also be conserved.

932

933 **S3 Fig. Specificity of anti-KCTD5 antisera and co-immunoprecipitation of Cul3 and endogenous**  
934 **KCTD2/5/17.**

935 **(A)** Western blot of extracts from 293T cells transfected with indicated expression vectors and probed  
936 with anti-KCTD5. Arrow indicates endogenous species corresponding to KCTD 2/5/17. The first lane  
937 of the blot contains a control sample from cells transfected with empty vector and treated in parallel.

938 **(B)** 293T cells transfected and immunoprecipitated as indicated.

939

940 **S4 Fig. Additional sleep parameters for animals expressing Inc and Inc orthologs.**

941 **(A-D)** Sleep parameters for animals expressing Inc and Inc orthologs panneuronally under *elav-Gal4*  
942 control. n = 37-40 as in Figure 4C; \* p < 0.01 compared to *elav-Gal4* control; ns, not significant (p >  
943 0.05). **(E-H)** Sleep parameters for *inc<sup>1</sup> inc-Gal4* animals expressing Inc and Inc orthologs. n=18-157  
944 as in Figure 4D. \* p < 0.01 compared to *inc<sup>1</sup> inc-Gal4* animals, but not significantly different from  
945 wild-type control. † p < 0.01 for comparisons to *inc<sup>1</sup> inc-Gal4* animals and to wild-type controls. For  
946 all panels, mean ± SEM is shown. (A and E) Nighttime sleep. (B and F) Daytime sleep. (C and G)  
947 Sleep bout length. (D and H) Sleep bout number.

948

949 **S5 Fig. Localization of Insomniac family members in cultured cells.**

950 **(A)** Confocal micrographs of fixed S2 cell expressing 3×Myc-Inc (left panel), live S2 cell expressing  
951 Inc-GFP (middle panel), and fixed S2 cell expressing Inc-GFP (right panel). **(B-D)** Confocal  
952 micrographs of fixed 293T cells expressing indicated proteins bearing a 3×Myc tag (B), GFP tag (C),  
953 or 3×HA tag (D). Scale bar is 10 μM.

954

955 **S6 Fig. Immunohistochemical analysis of Inc localization at NMJ 4 and in male larvae.**

956 (A) Confocal micrograph of NMJ 4 from a female third instar *inc-Gal4* / + ; *UAS-Myc-Inc* / + larva.

957 (B) Confocal micrograph of NMJ 6/7 from a male third instar *inc-Gal4* ; *UAS-Myc-Inc* / + larva. Note

958 higher level of Inc signal in muscle and HRP-negative trachea relative to female larva shown in Figure

959 6I; this higher level of expression may reflect dosage compensation of the X-linked *inc-Gal4*

960 transgene in hemizygous males versus heterozygous females, or sex-specific position effects of the X-

961 linked *inc-Gal4* transgene insertion site. Male and female animals heterozygous for autosomal

962 insertions of the *inc-Gal4* transgene exhibit similarly weak levels of *UAS-Myc-Inc* expression in

963 muscle (not shown).

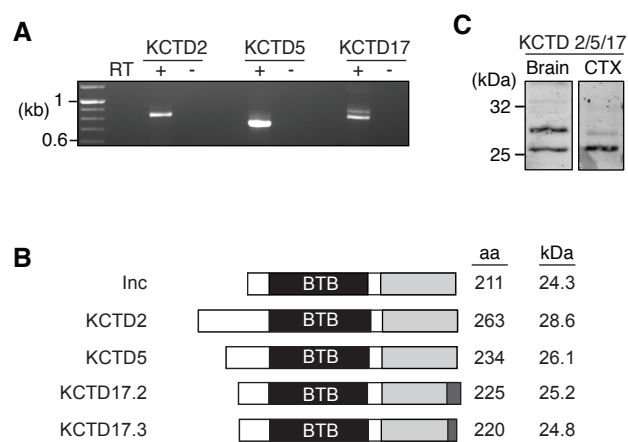

Figure 1

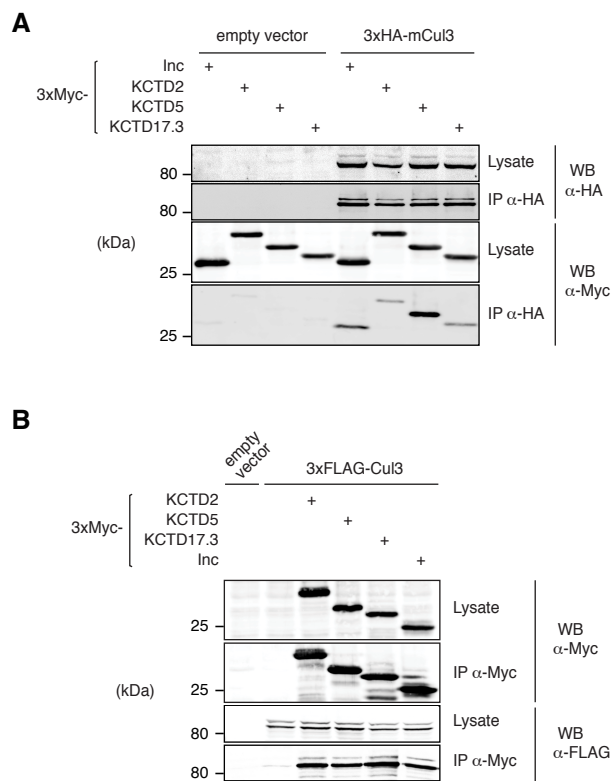

Figure 2

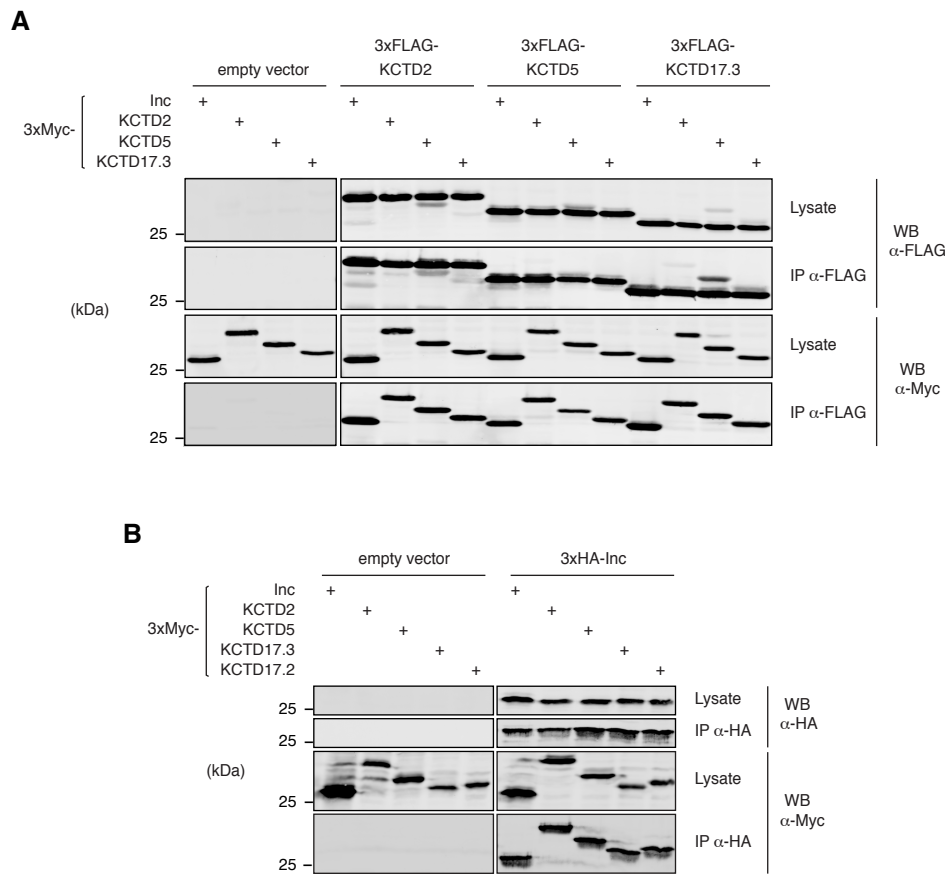

Figure 3

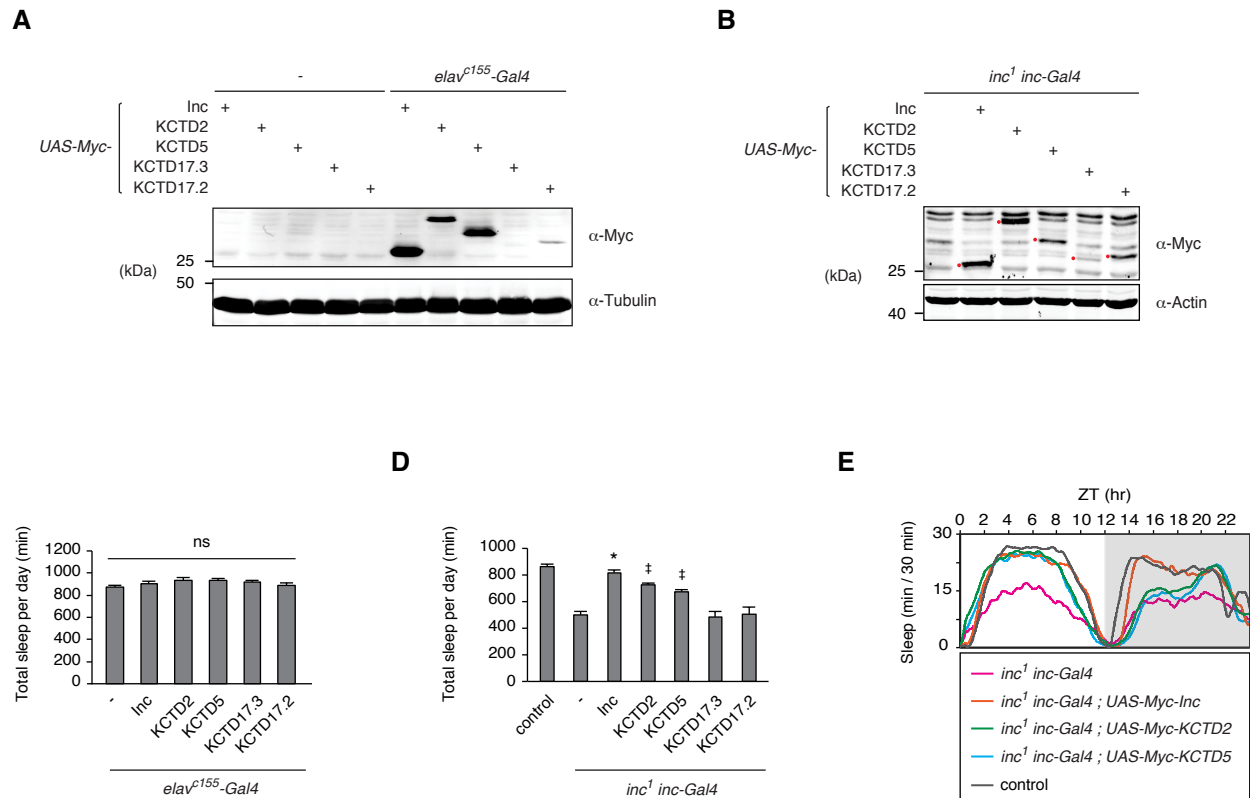

Figure 4

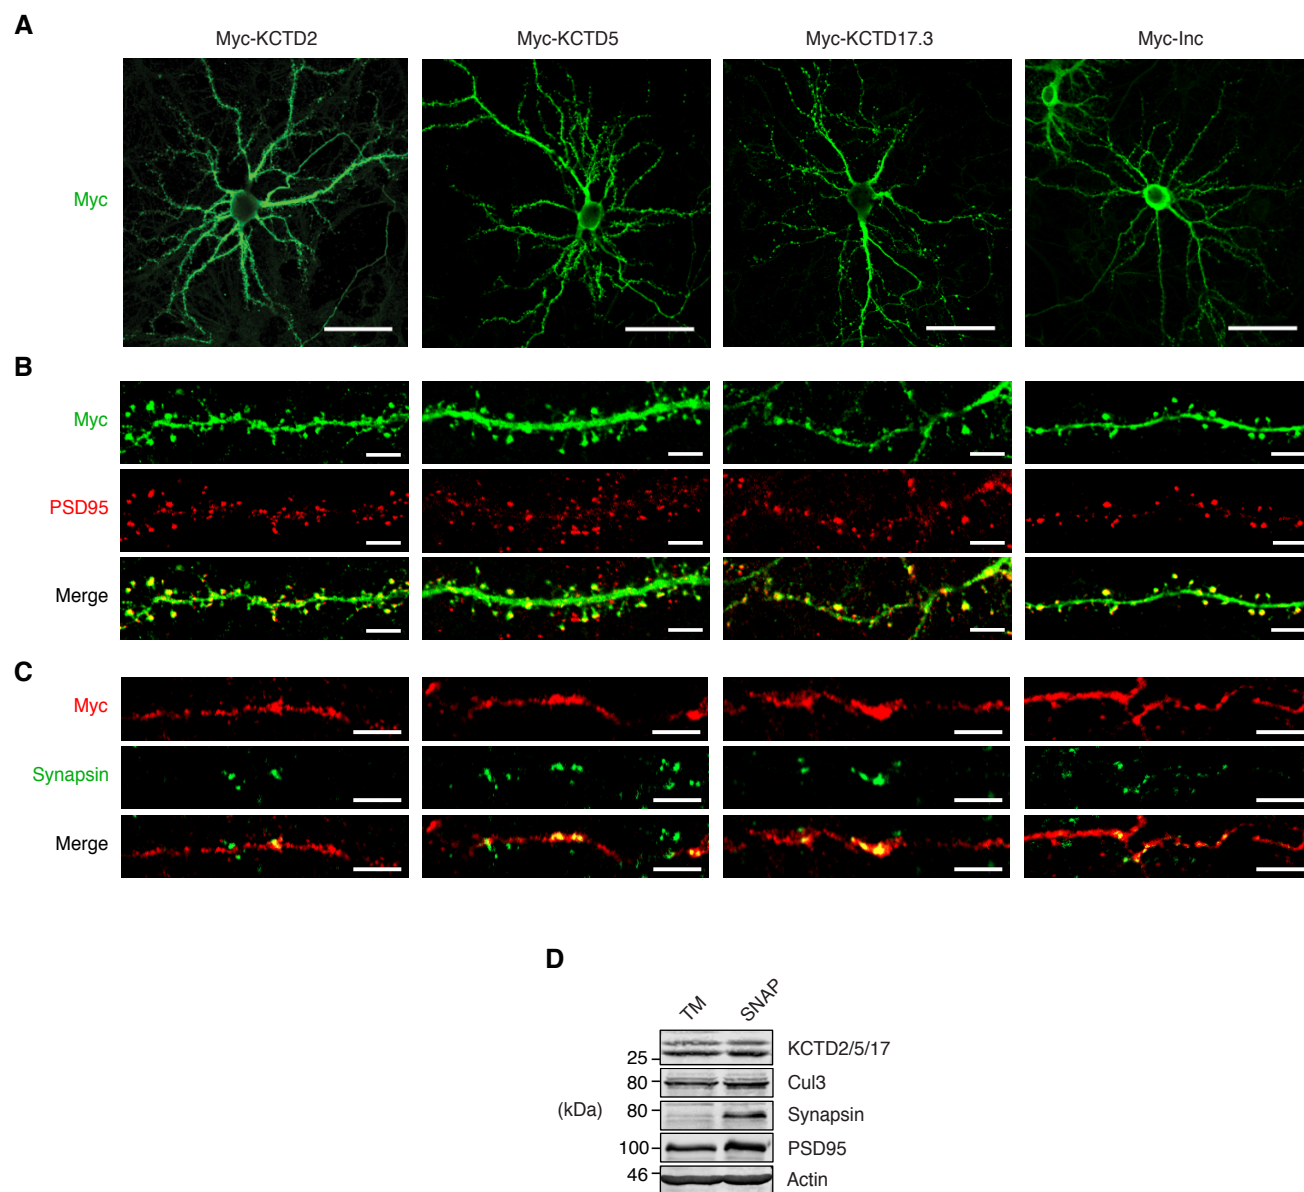

Figure 5



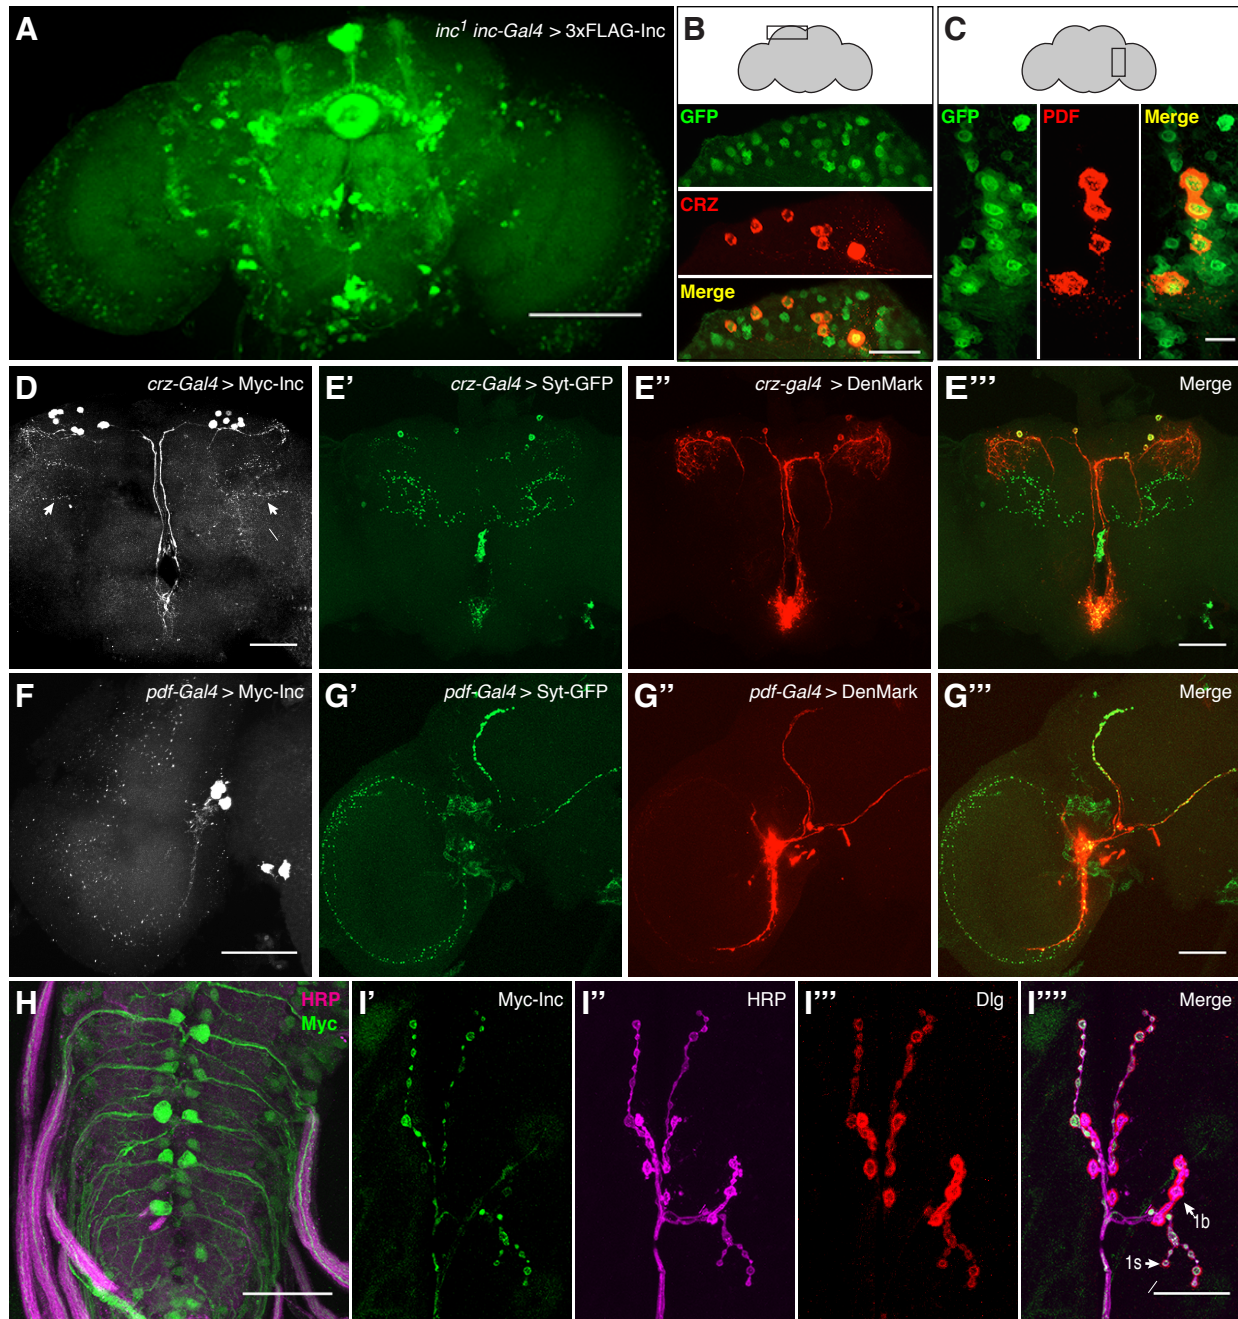

Figure 6

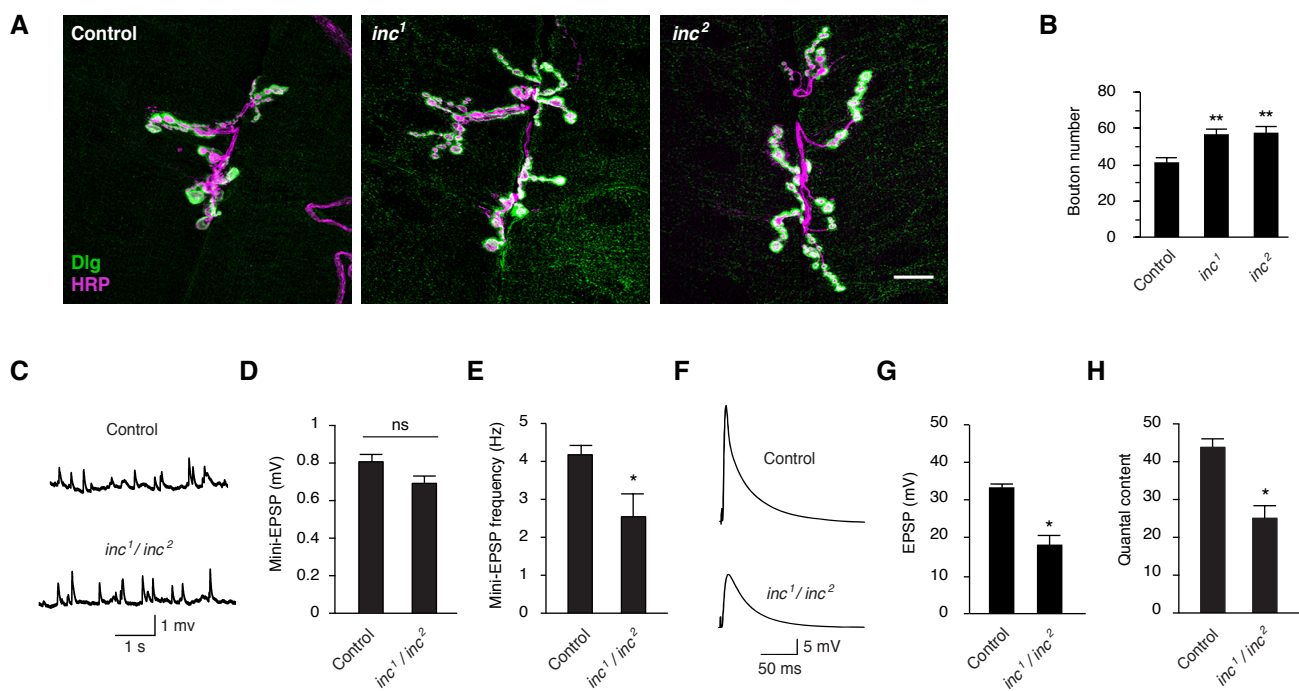

Figure 7

**A**

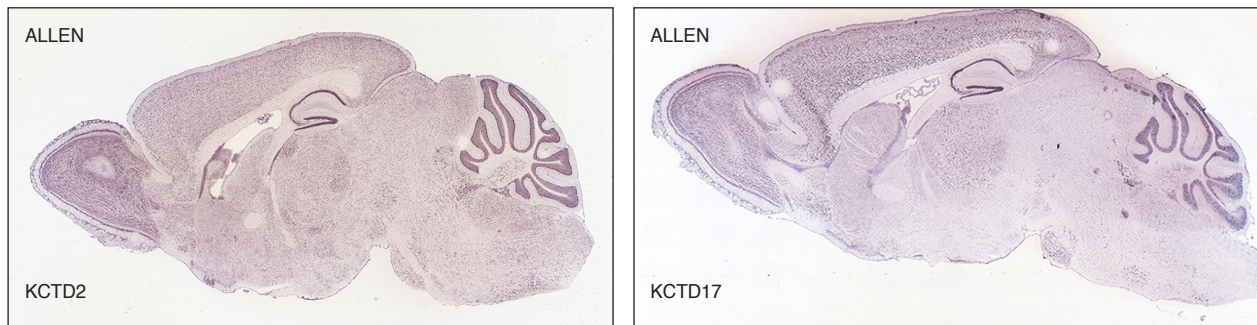

**B**

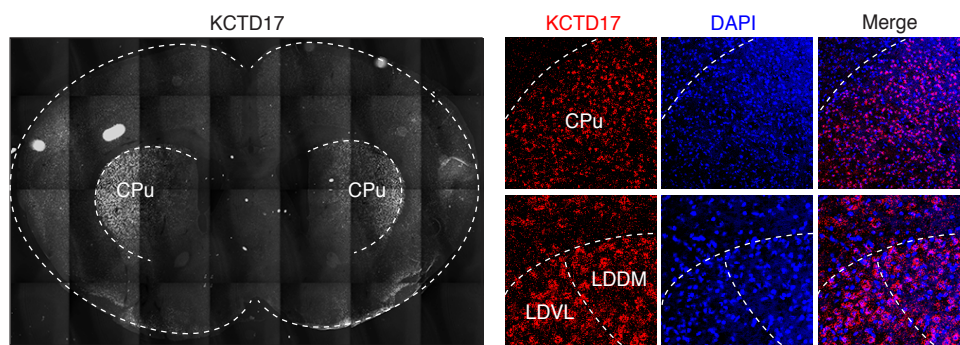

Figure S1

**A**

```

Inc          1 -----MSTVFINSRKSPN
mKCTD17.2   1 -----MOTTRPAMRMEAGEAAPPVVGAG
mKCTD17.3   1 -----MOTTRPAMRMEAGEAAPPVVGAG
mKCTD2       1 MAEL---QLDPAVAGLGGGSSAMGDGGGSGRGPSPRPAGPTPRGHGRQPAAAAPLEPGPGPP---E
mKCTD5       1 MAENHCELLPPAPSGLGAGLG-----GGLC-----RRCSAGMGA-----L

                                     BTB

Inc          14 VLKKQCTDQWVRLNVGGTYFLTKTTLSRDNSFLSRI-QEDCDLISDRDETGAYLIDRDPKVFAPVLN
mKCTD17.2   23 GRPGGCGKWVRLNVGGTVFLTRQTLCREQKSFLSRLCOG--EELQSDRDETGAYLIDRDPTYFGPILN
mKCTD17.3   23 GRPGGCGKWVRLNVGGTVFLTRQTLCREQKSFLSRLCOG--EELQSDRDETGAYLIDRDPTYFGPILN
mKCTD2       64 RTGGGGAARWVRLNVGGTYFVTTRQTLGREPKSFLCRLCCOEDPELSDKDETGAYLIDRDPTYFGPILN
mKCTD5       36 AQRPGGVSKWVRLNVGGTYFLTRQTLCRDPKSFLVRLCQADPDLSDKDETGAYLIDRDPTYFGPVLN

Inc          83 YLRHGKLVLD-GVSEEGVLEEAFYNIVTOLIALLKECLHRDQR-PQTDKKRVYRVLQCREQEELTQMIST
mKCTD17.2   91 FLRHGKLVLDKDMAEEGVLEEAFYNIGPLIRIIKDRMEEKDYTVAQVPPKHVYRVLQCEEELTQMVST
mKCTD17.3   91 FLRHGKLVLDKDMAEEGVLEEAFYNIGPLIRIIKDRMEEKDYTVAQVPPKHVYRVLQCEEELTQMVST
mKCTD2       134 YLRHGKLVITKELAEEGVLEEAFYNIASLVRLVKERIRDNENRTSQGPVKHVYRVLQCEEELTQMVST
mKCTD5       105 YLRHGKLVINKDLAEEGVLEEAFYNITSLKLVKDKIRERDSKISQMPVKHVYRVLQCEEELTQMVST

Inc          151 LSDGWRFEQLISMQY-TNYGPFENNEFLCVVSKECGTT-AGRELELNDRAKVLQQKGSRILGI--
mKCTD17.2   161 MSDGWRFEQLVNIGSSYNYGSEDQAEFLCVVSKELHSSPHGLSSESTRKAKVPVRTLPDPSLSLQ
mKCTD17.3   161 MSDGWRFEQLVNIGSSYNYGSEDQAEFLCVVSKELHSSPHGLSSESTRKAKLLQARGTRM-----
mKCTD2       204 MSDGWRFEQLISGSSYNYGSEDQAEFLCVVSKELNSTNGIVIEPSEKAKILQERGRSRM-----
mKCTD5       175 MSDGWRFEQLVSIGSSYNYGSEDQAEFLCVVSKELHNTFYCTSEPSEKAKILQERGRSRM-----

                                     C-terminal domain

```

**B**

|              |                    |                                                                                                                                                                |         |
|--------------|--------------------|----------------------------------------------------------------------------------------------------------------------------------------------------------------|---------|
| Brain RT-PCR | Transcript isoform | 254                                                                                                                                                            |         |
| +            | mKCTD2             | KAKILQERGRM                                                                                                                                                    |         |
| +            | mKCTD5             | KAKILQERGRM                                                                                                                                                    |         |
|              | mKCTD17.1          | KAKPCHLRIP <del>LT</del> FSPSHRLLLLRFLLEVPV <del>RTL</del> PDPSLSLQ                                                                                            |         |
| +            | mKCTD17.2          | KAK-----VPV <del>RTL</del> PDPSLSLQ                                                                                                                            |         |
| +            | mKCTD17.3          | KAKLLQARGTRM                                                                                                                                                   |         |
|              | mKCTD17.v1         | KAKSTDEQLEE <del>QRRQVEEVEVAQVQVEADAQEK</del> ALSSQDPANLFSLPPPPPPPLPAGGPASSSTSSSSWISSAPCLFPLCPGFLSACSRHPGAALVPVSRALSPSPALHPQASCLPPSPLPAPPASWPGEGRGRICLSSNPAEHL |         |
|              | mKCTD17.v8         | KAKSTDEQLEE <del>QRRQVEEVEVAQVQVEADAQEK</del> ALSSQDPANLFSLPPPPPPPLPAGGCPHPPRPKPELAVRAPRPRARPQSCRPCYYKPEAPGCEPPDHLQGLGVPI                                      |         |
|              | mKCTD17.v4         | KAKSTDEQLEE <del>QRRQVEEVEVAQVQVEADAQEK</del> -----GCPHPPRPKPELAVRAPRPRARPQSCRPCYYKPEAPGCEPPDHLQGLGVPI                                                         |         |
|              | hKCTD17.2          | KTKSTEEQLEE <del>QQQEEVEVEVEVQVQVEADAQEK</del> -----GSRPHPLRPEAE <del>LAVRASRPR</del> LARPQSCHPCCYKPEAPGCEAPDHLQGLGVPI                                         |         |
|              |                    | 211                                                                                                                                                            | 242-297 |

Figure S2

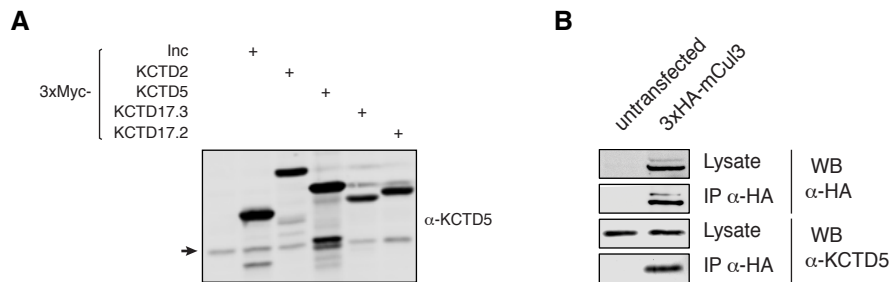

Figure S3

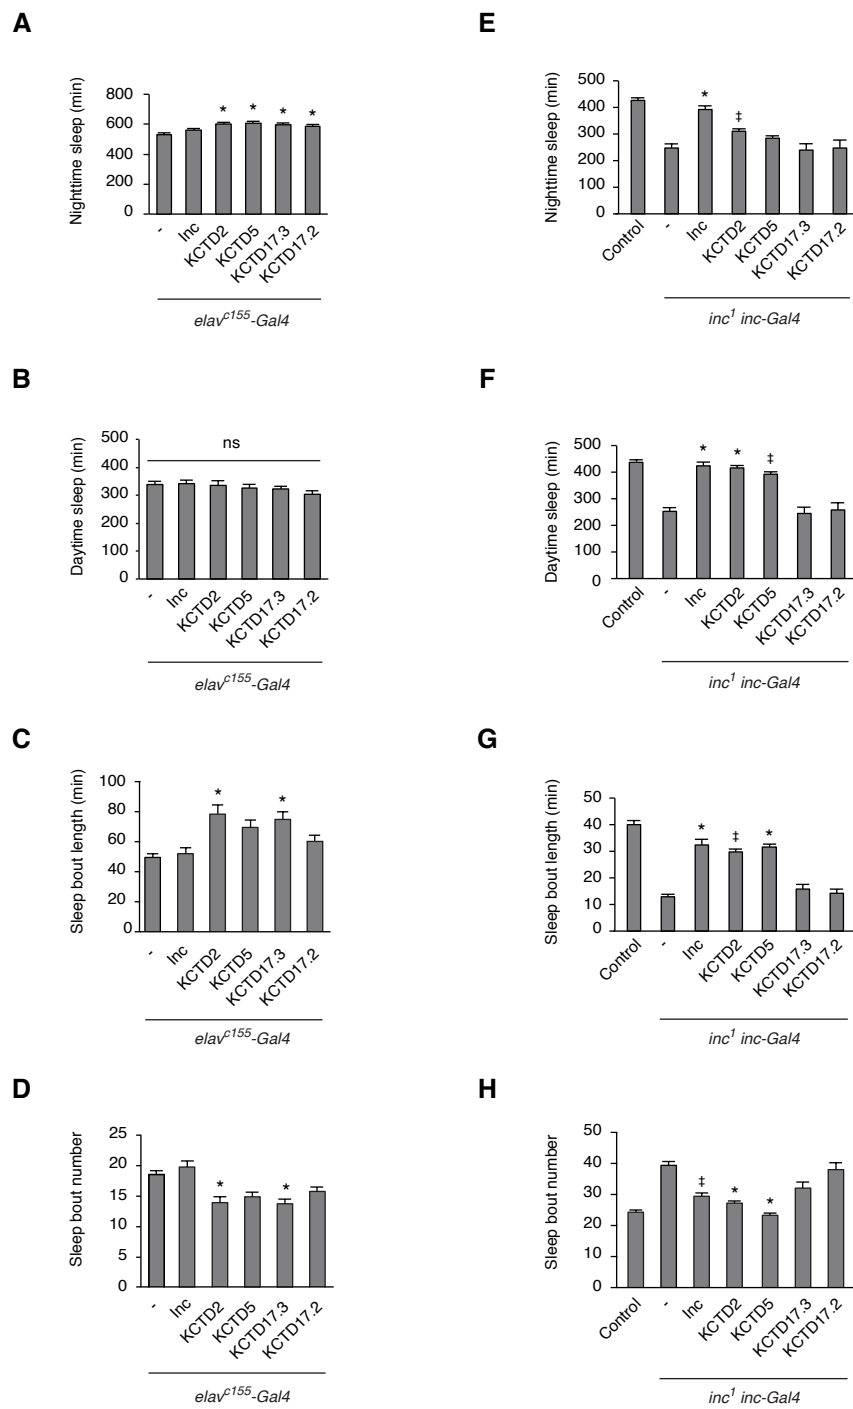

Figure S4

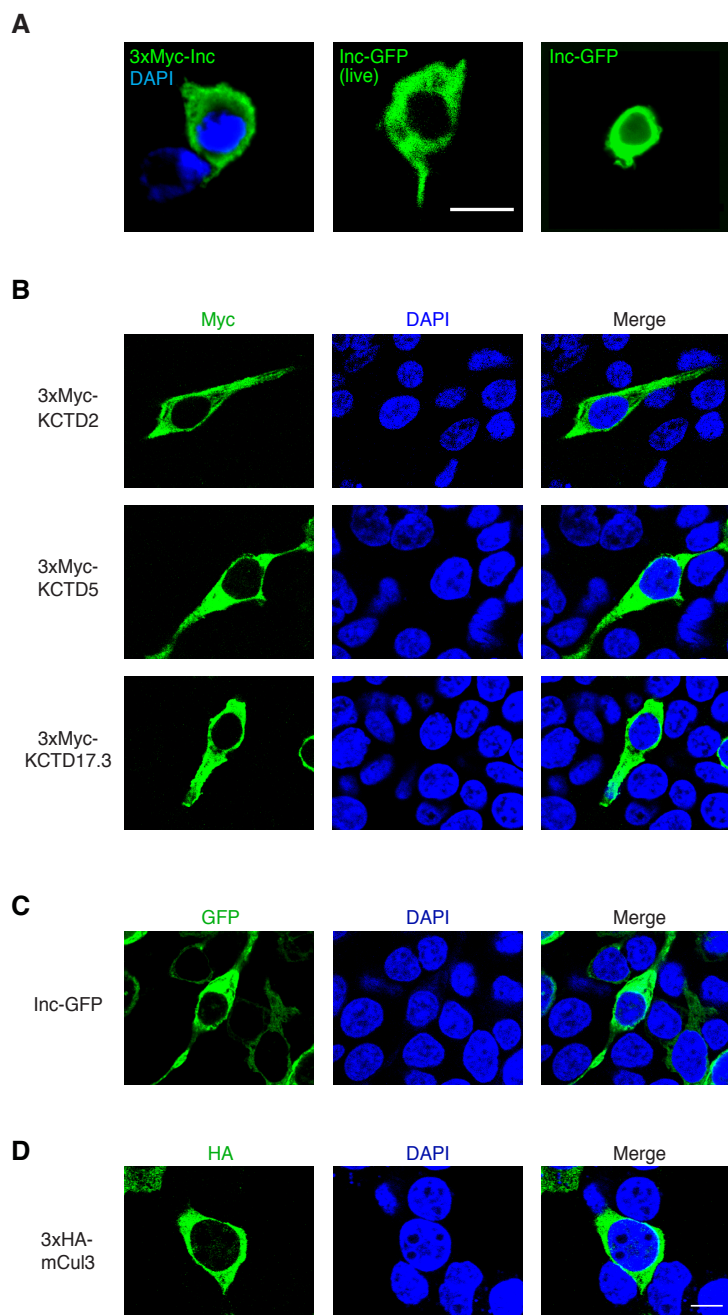

Figure S5

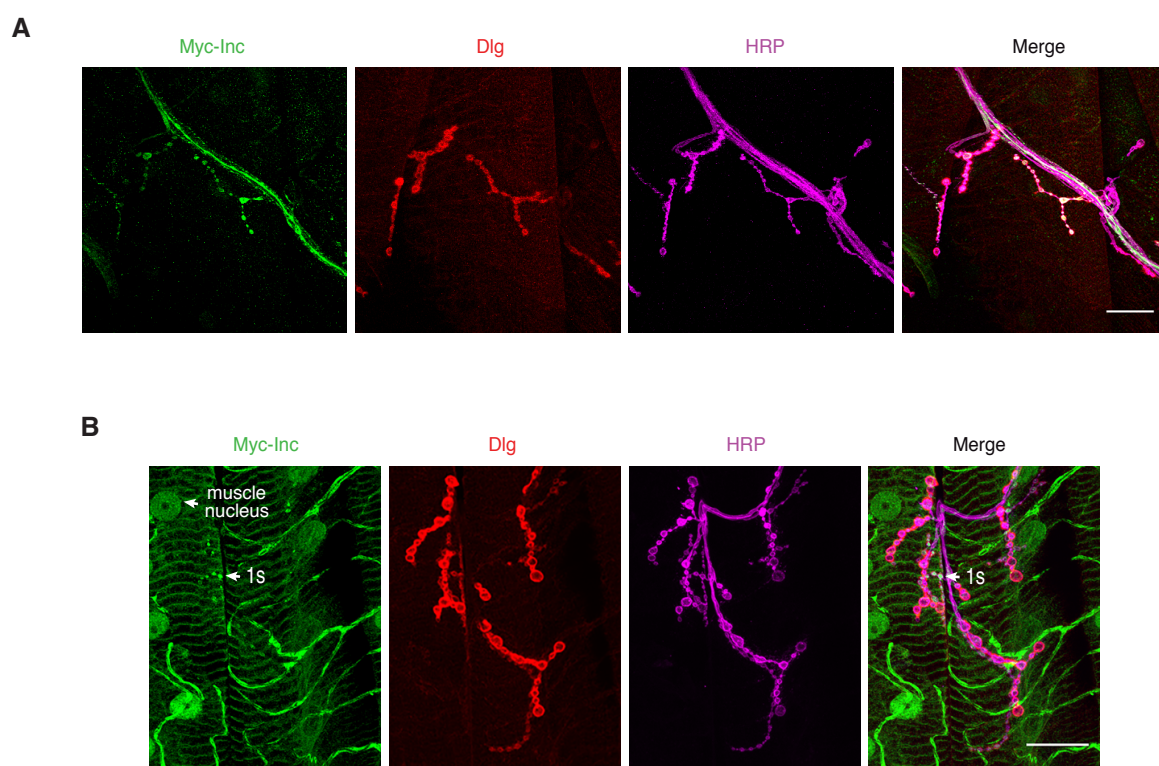

Figure S6
